# Supplementary material for: N-Heterocyclic carbene–palladium(ii)–1-methylimidazole complex catalyzed Suzuki–Miyaura coupling of benzylic chlorides with arylboronic acids or potassium phenyltrifluoroborate in neat water
Source: Royal Society of Chemistry journal article supplement (doi:10.1039/c3ob27353a), 2013-01-01

# Supporting Information

## ***N*-Heterocyclic Carbene-Palladium(II)-1-Methylimidazole Complex Catalyzed Suzuki-Miyaura Coupling of Benzylic Chlorides with Arylboronic Acids or Potassium Phenyltrifluoroborate in Neat Water**

Yun Zhang, Meng-Ting Feng and Jian-Mei Lu\*

*College of Chemistry and Materials Engineering, Wenzhou University, Chashan University Town, Wenzhou, Zhejiang Province 325035, People's Republic of China.*

Fax: +86-577-86689300 E-mail: [ljm@wzu.edu.cn](mailto:ljm@wzu.edu.cn)

### Table of contents

|   |                 |       |     |
|---|-----------------|-------|-----|
| 1 | Copy of Spectra | ..... | S-2 |
|---|-----------------|-------|-----|

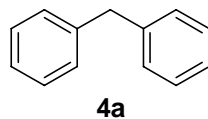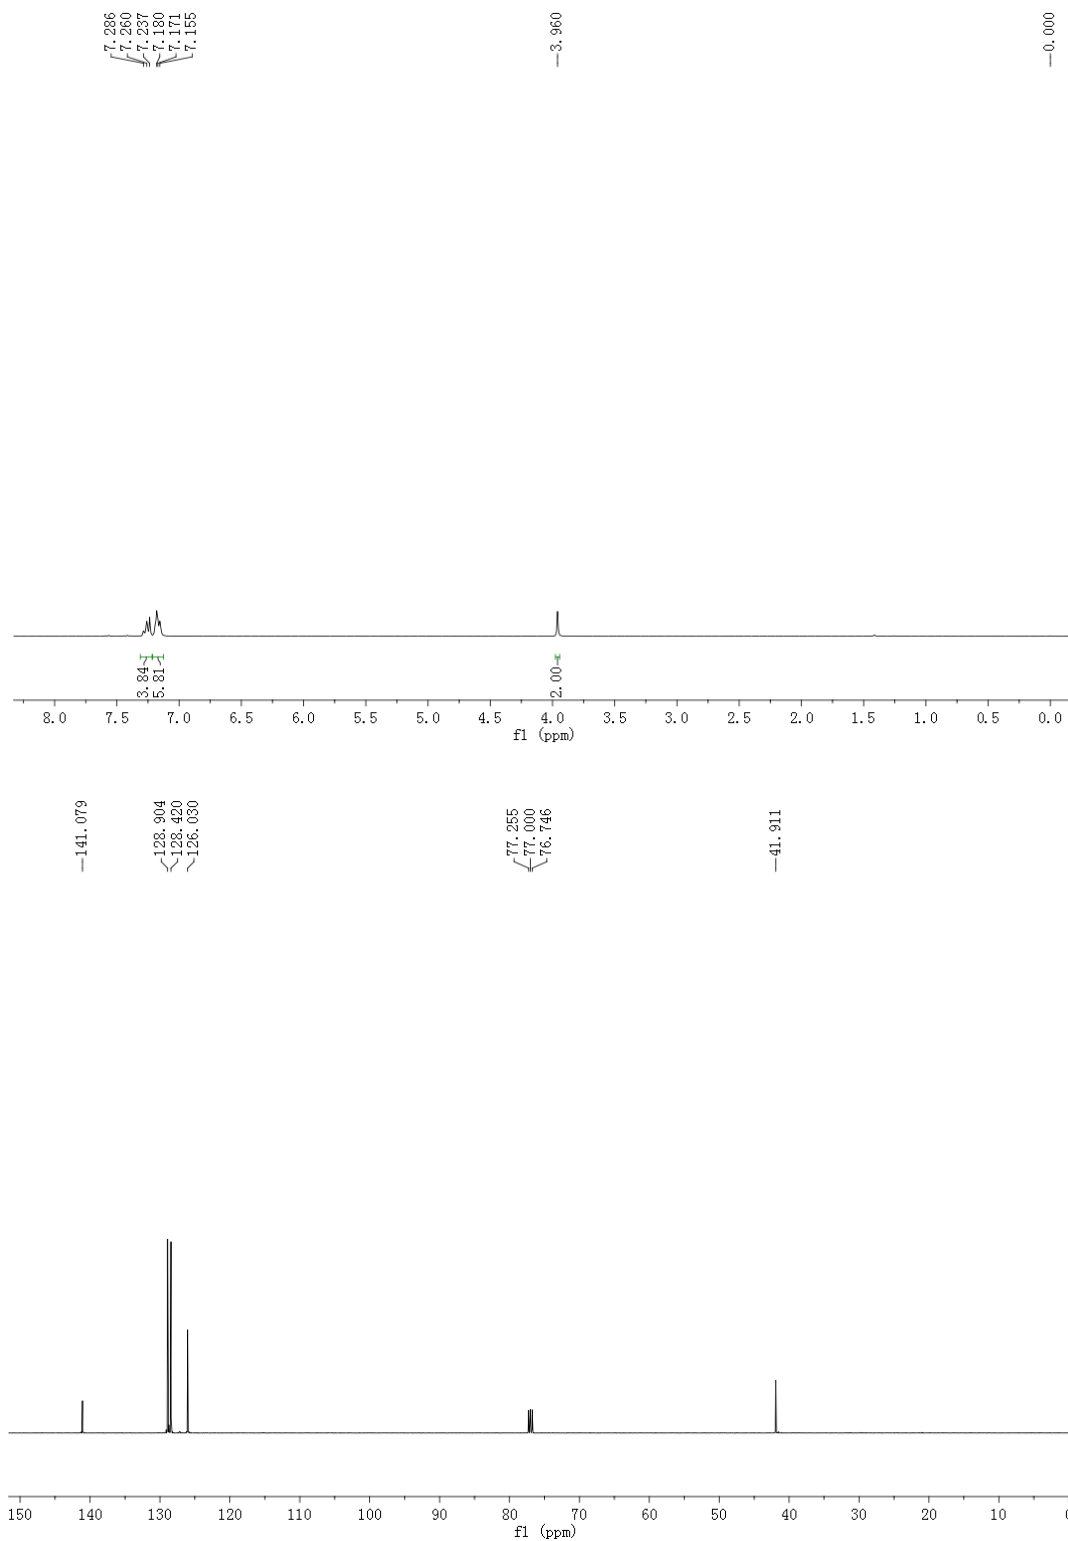

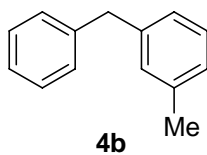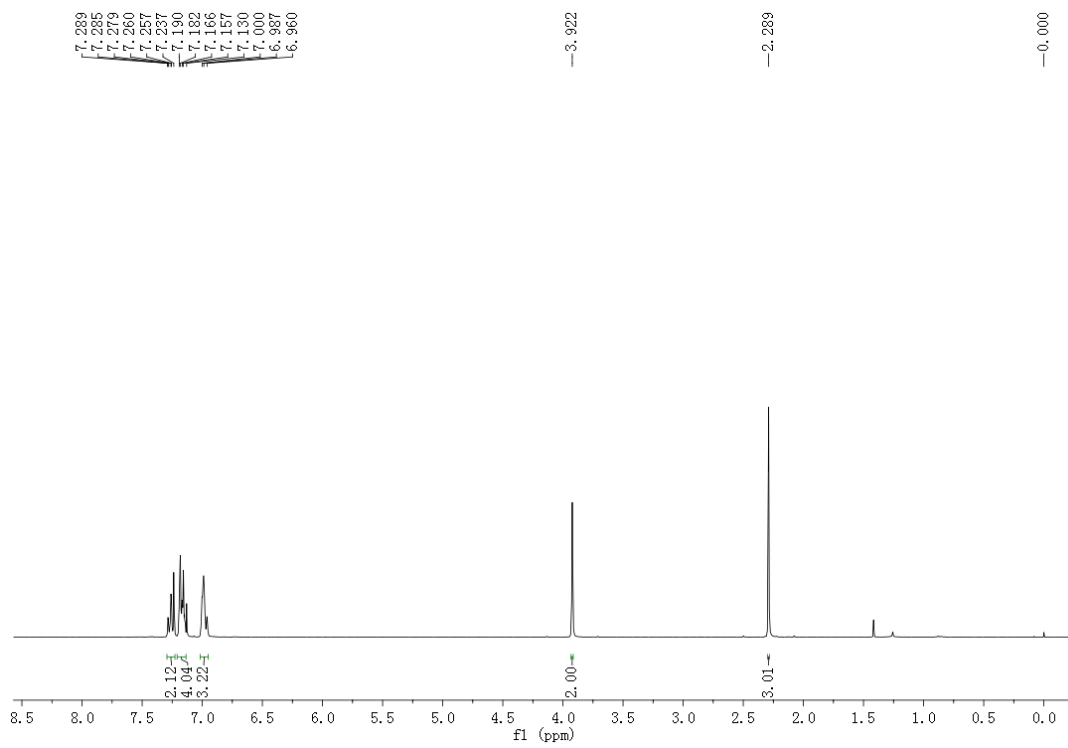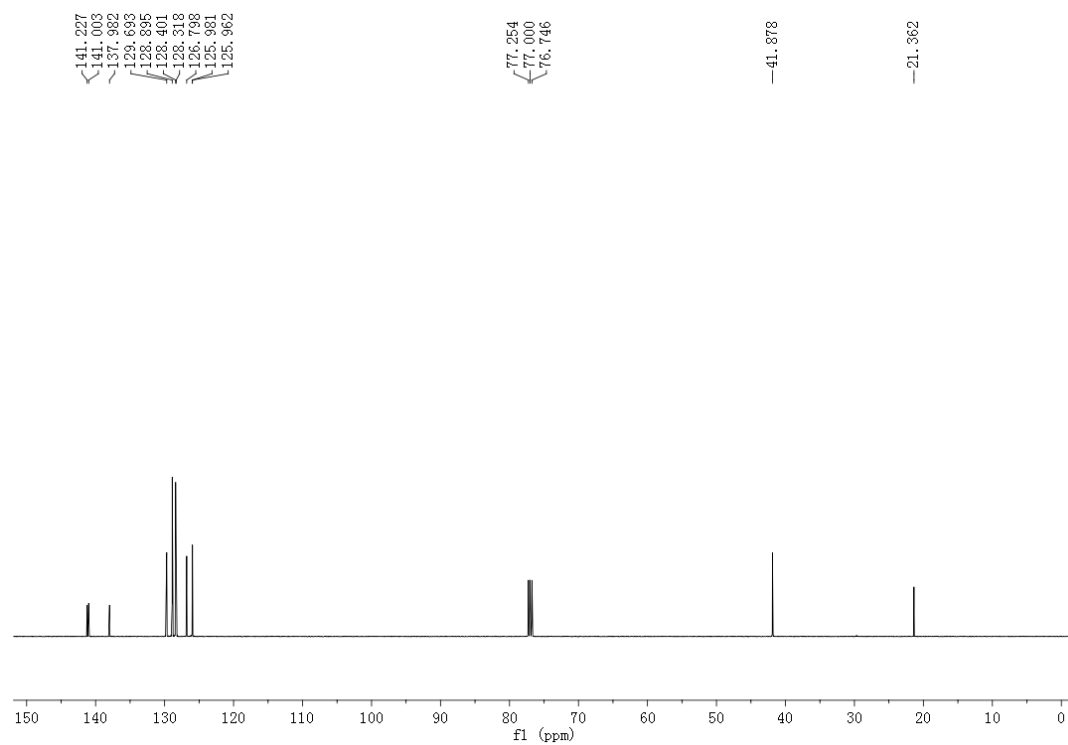

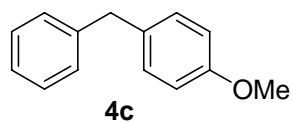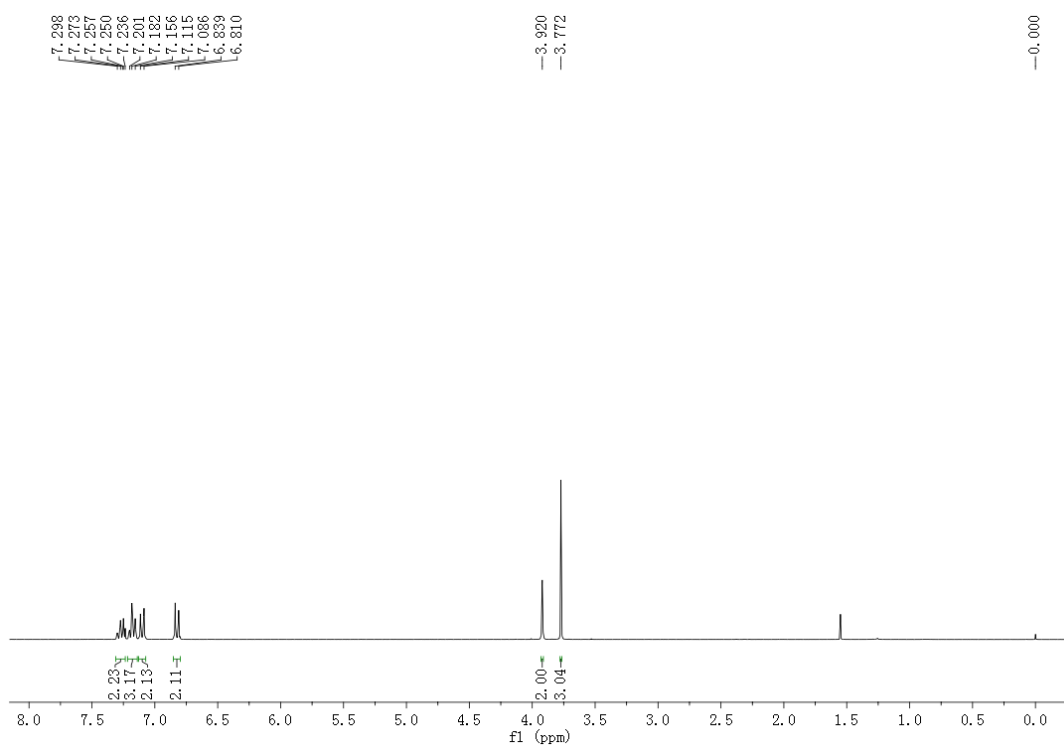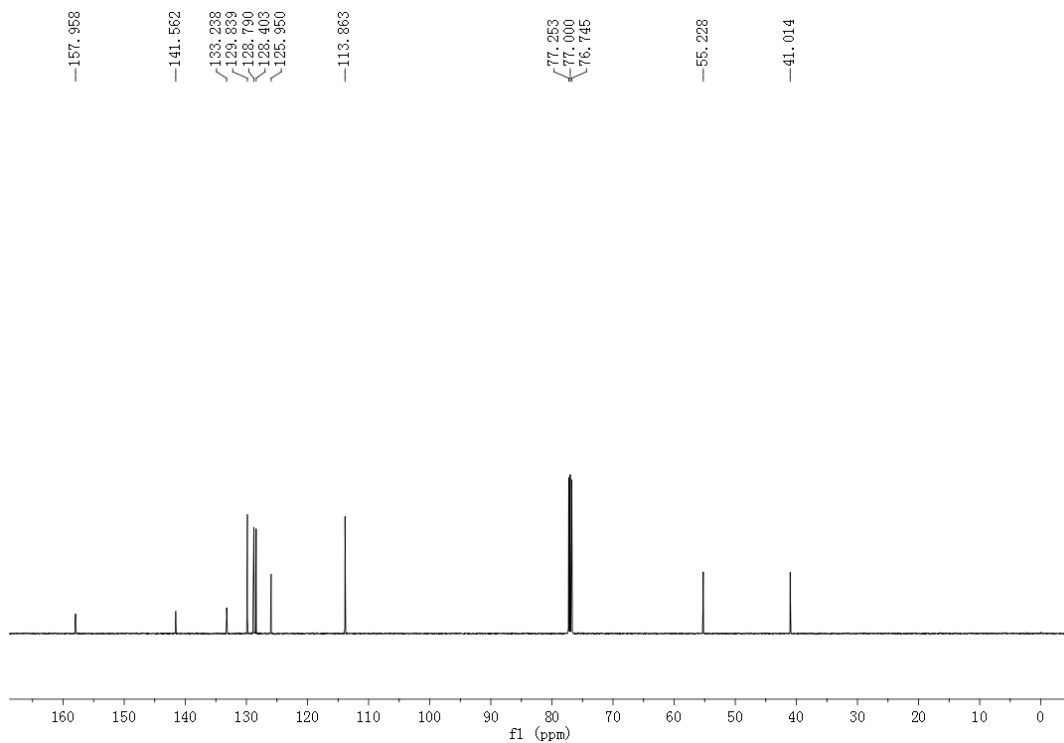

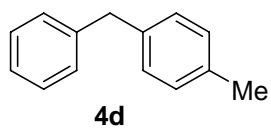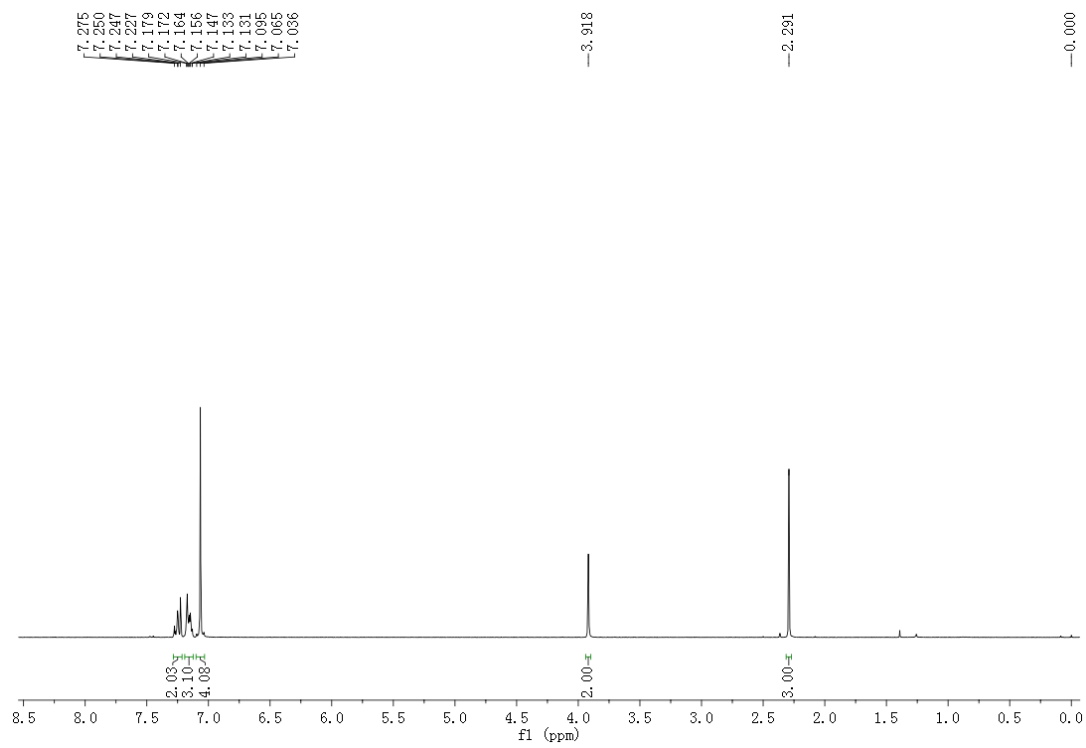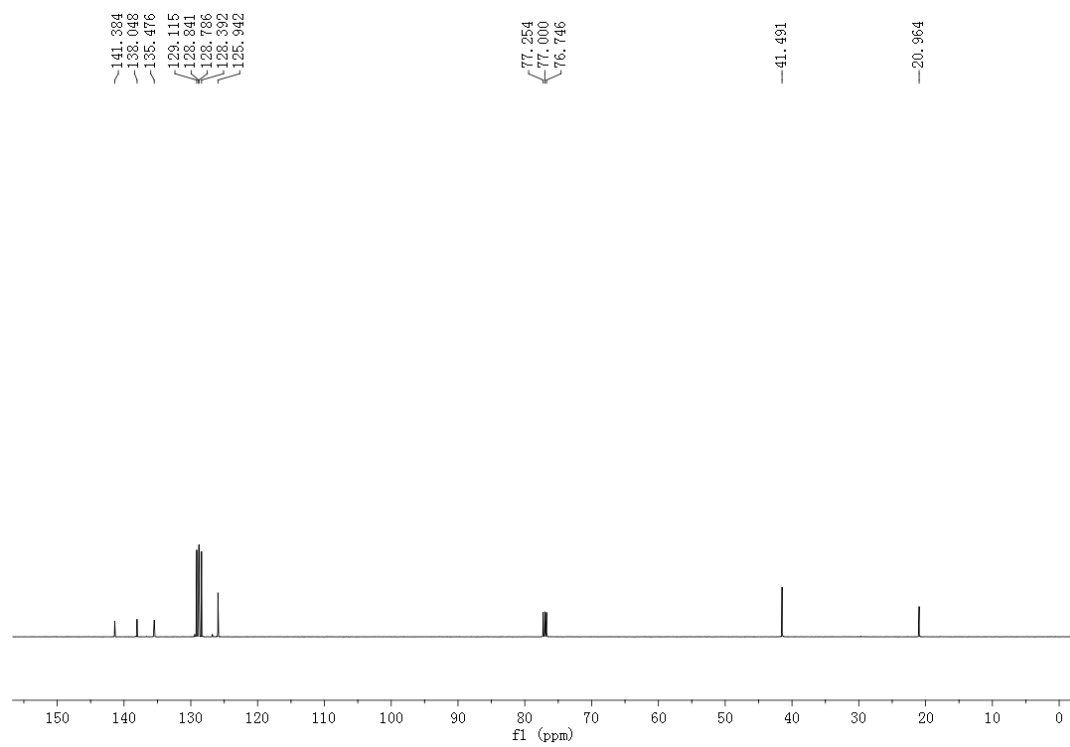

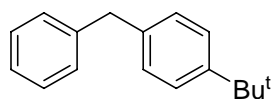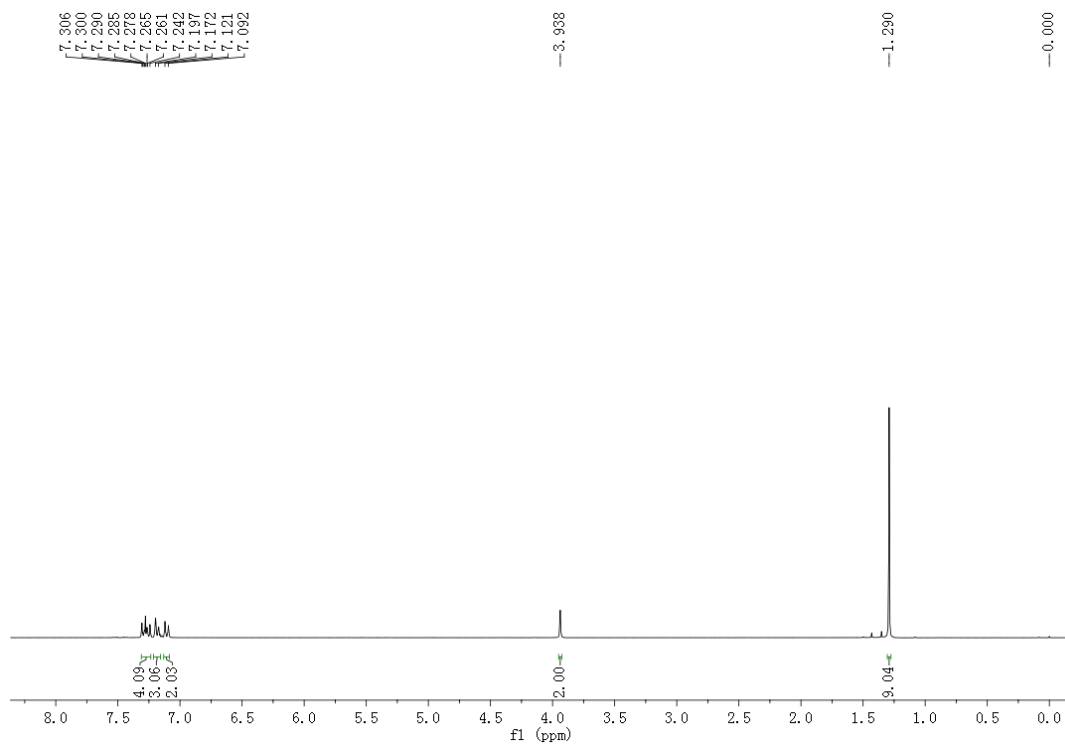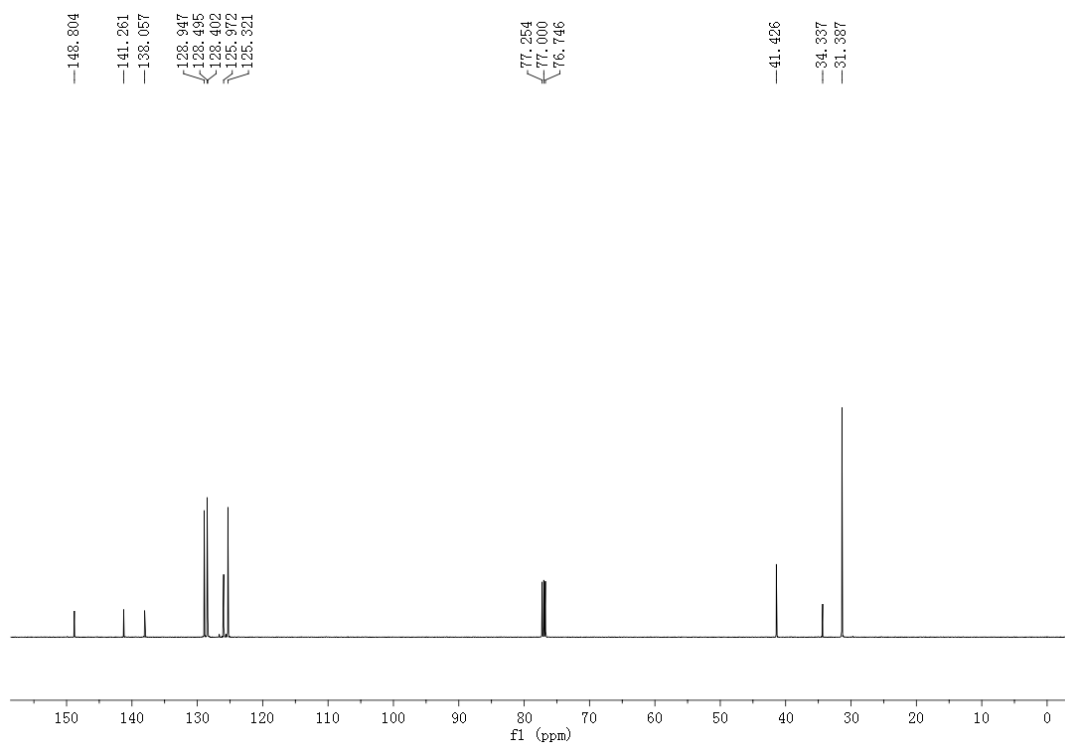

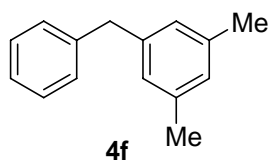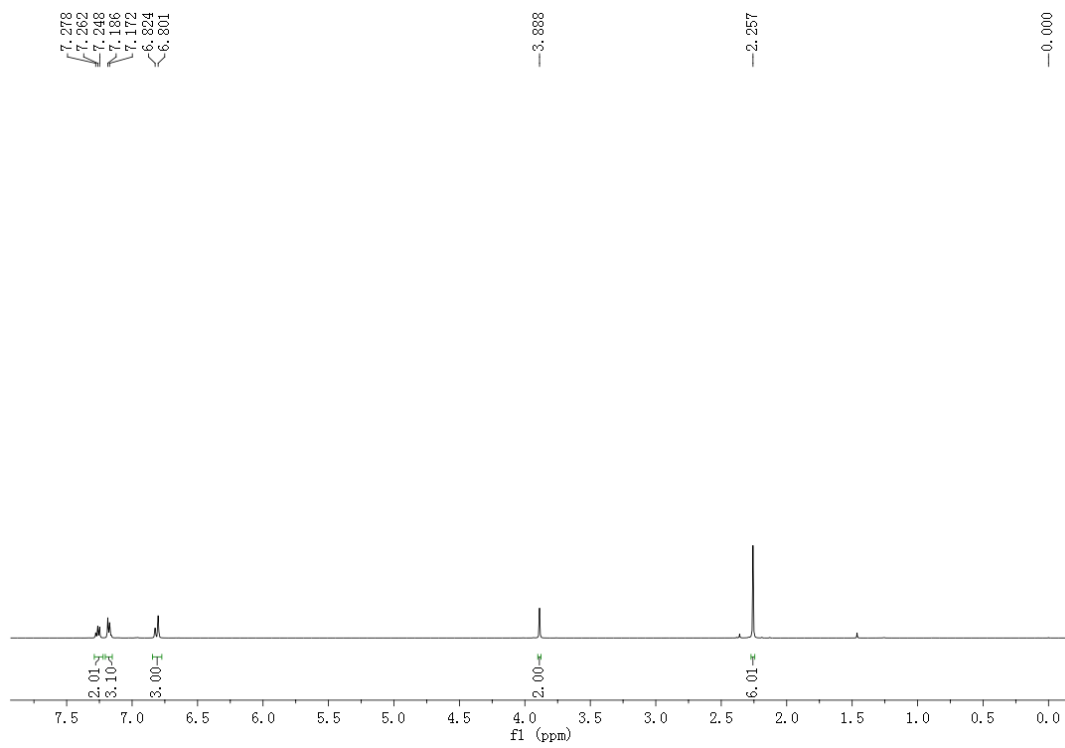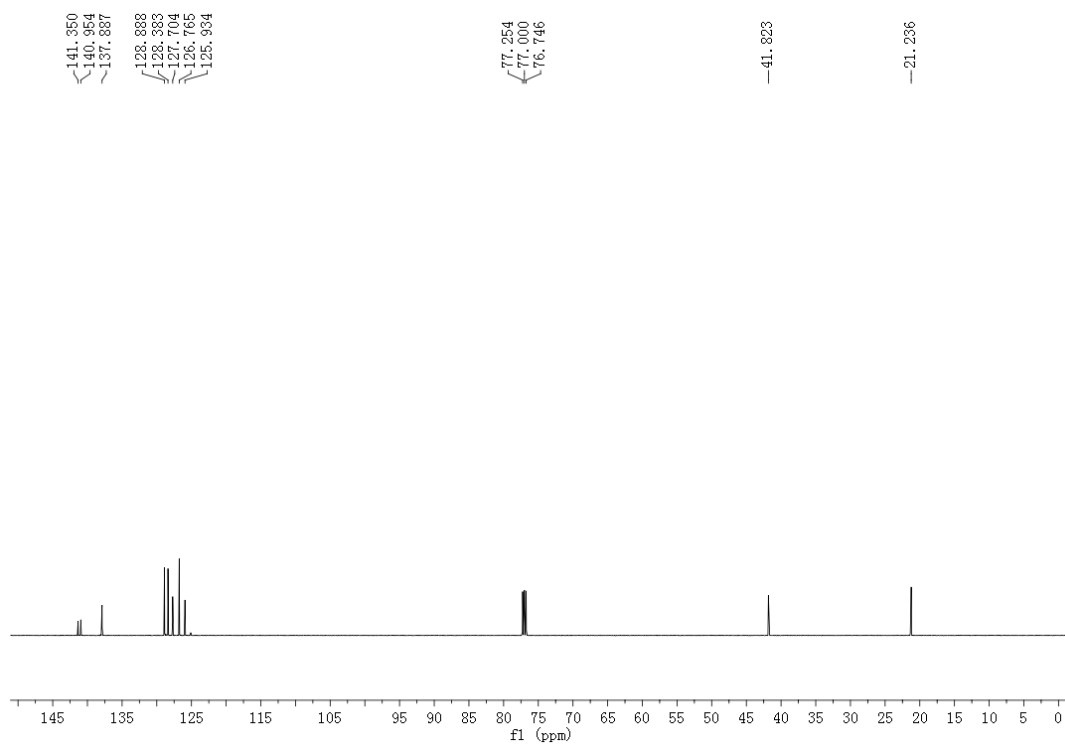

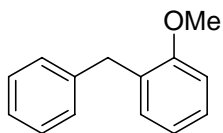

**4g**

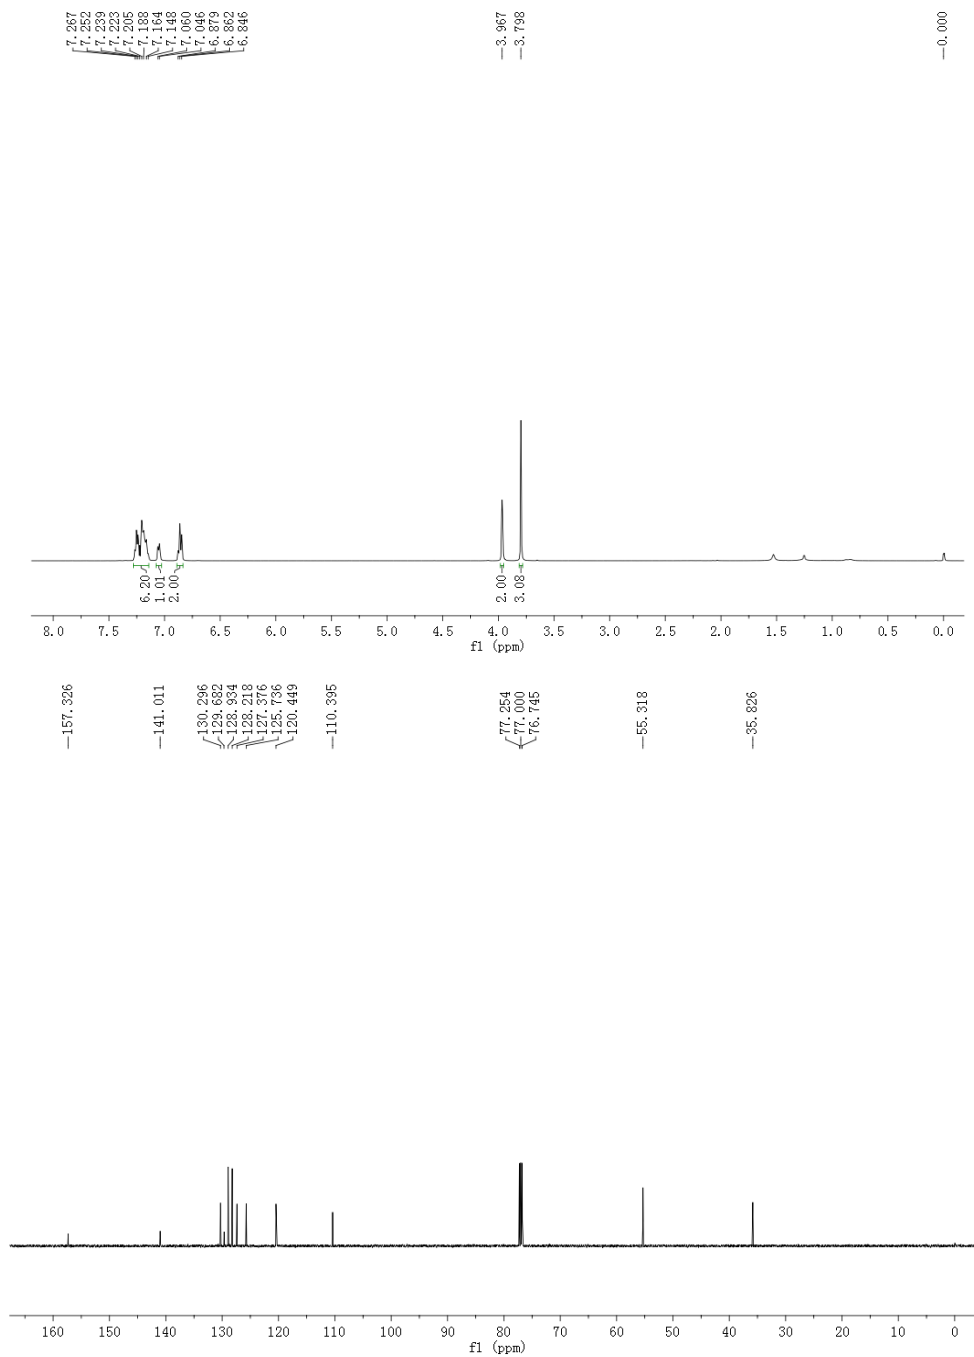



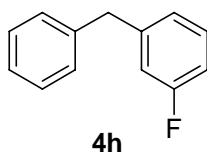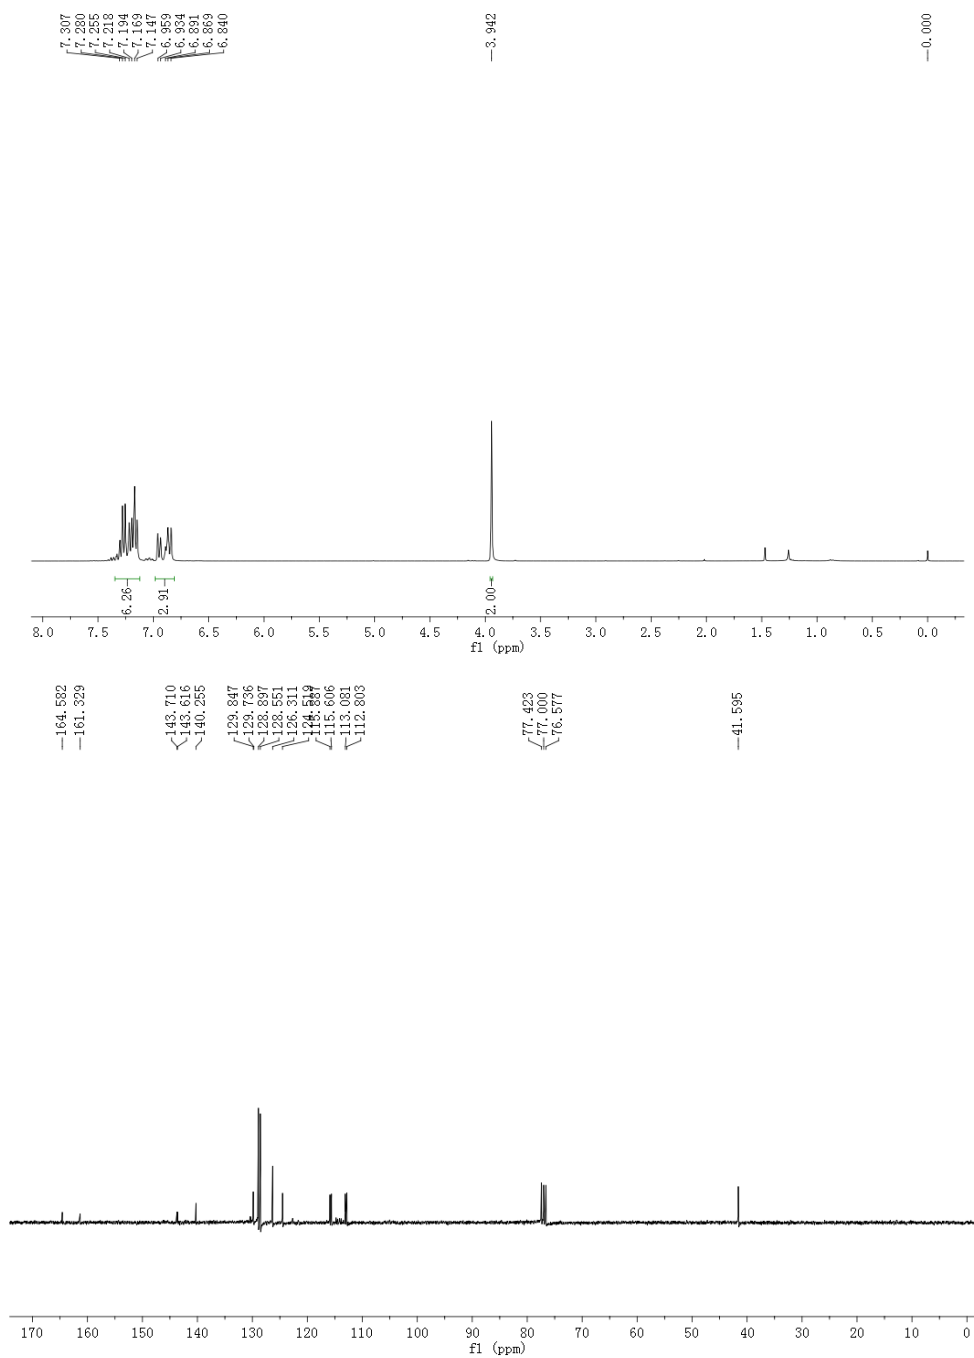

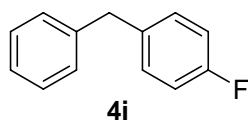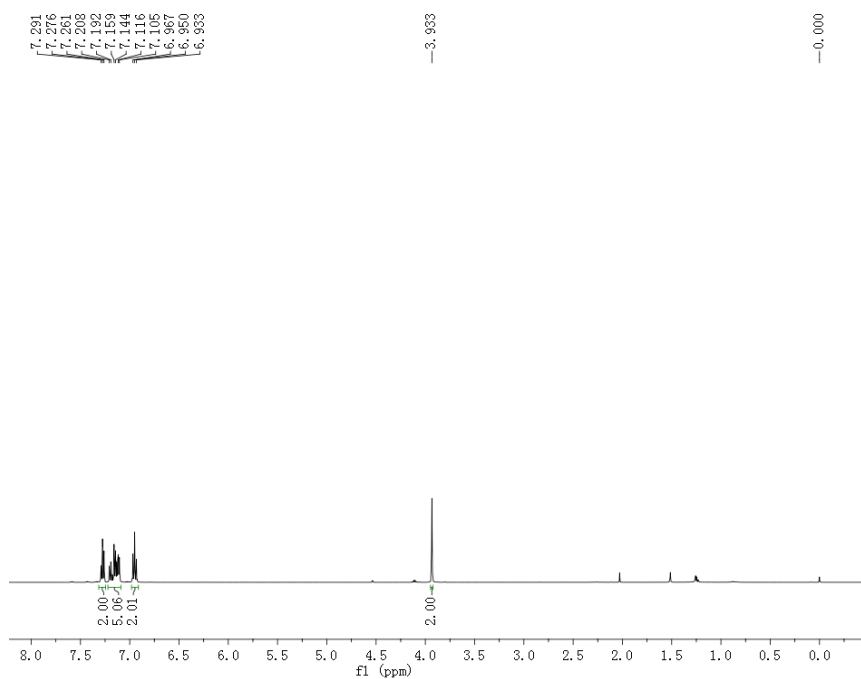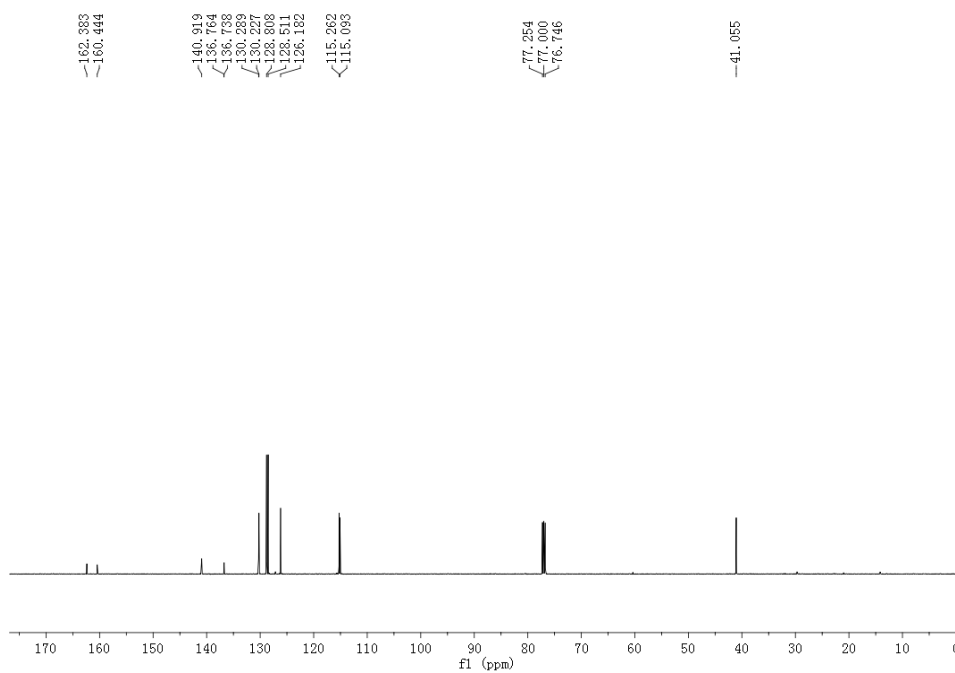

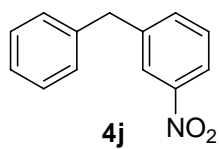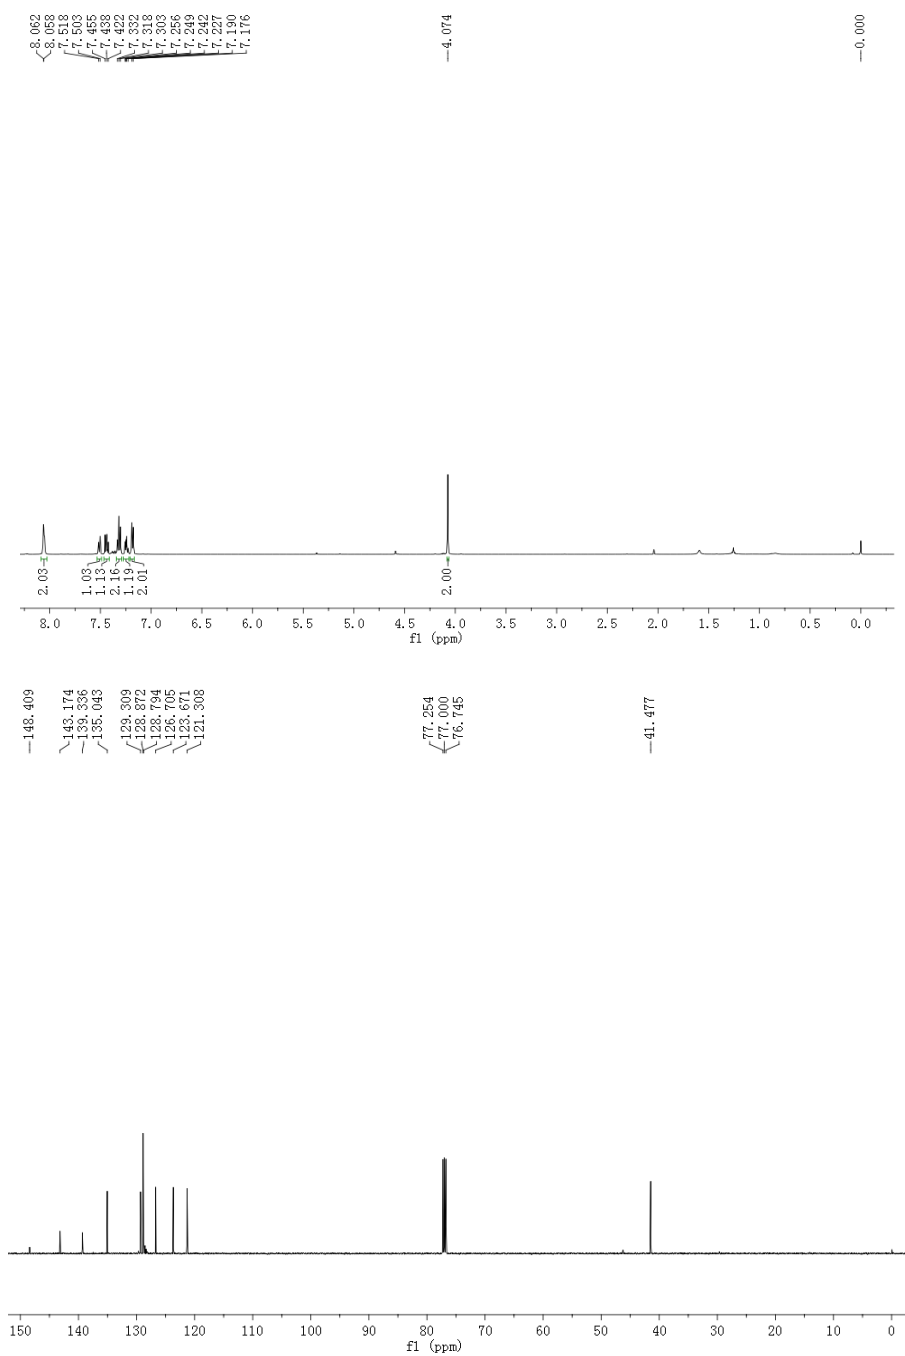

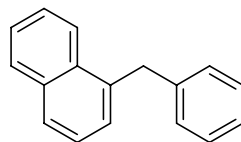

**4k**

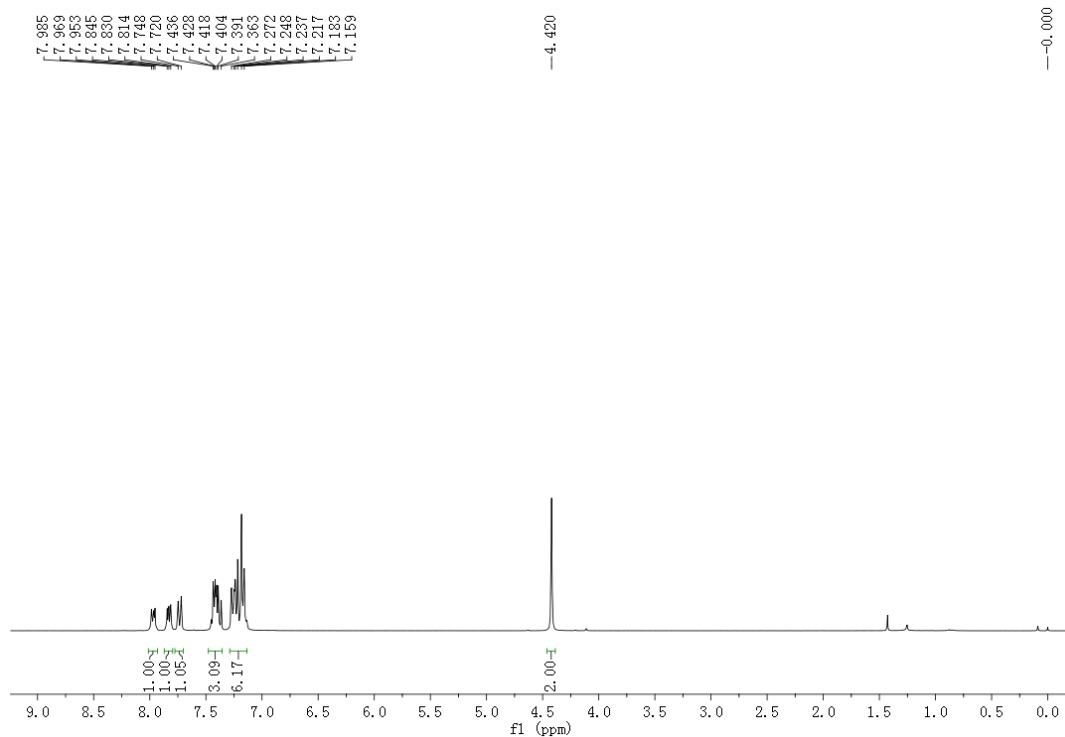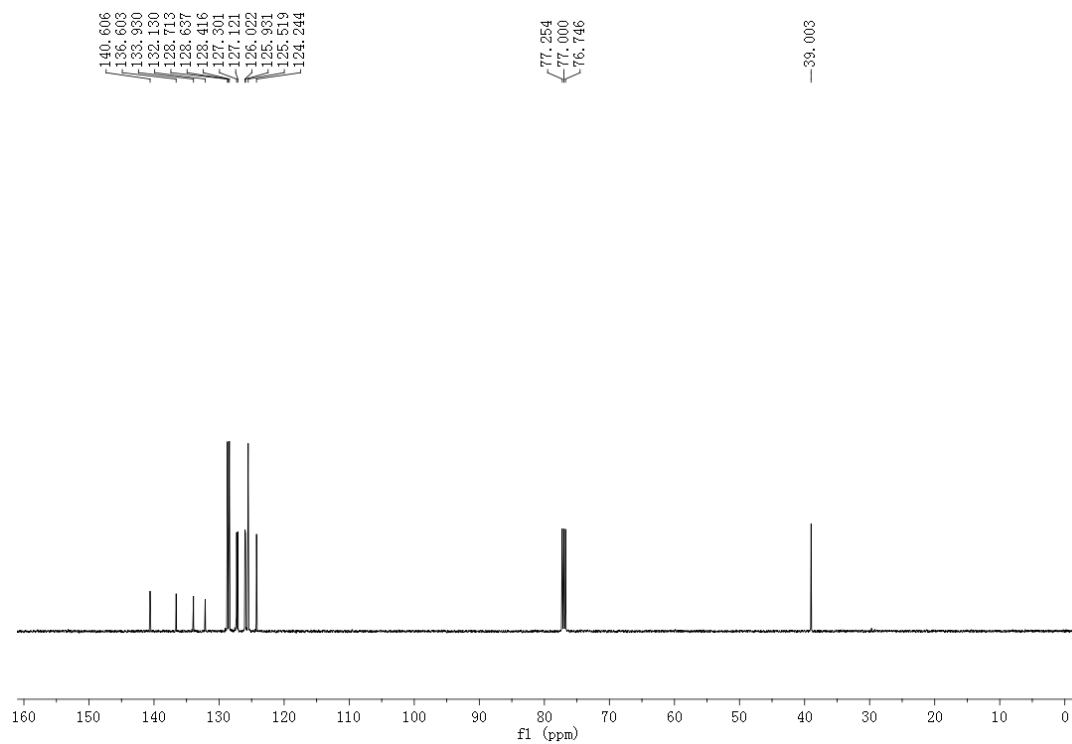

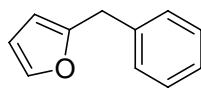

**4l**

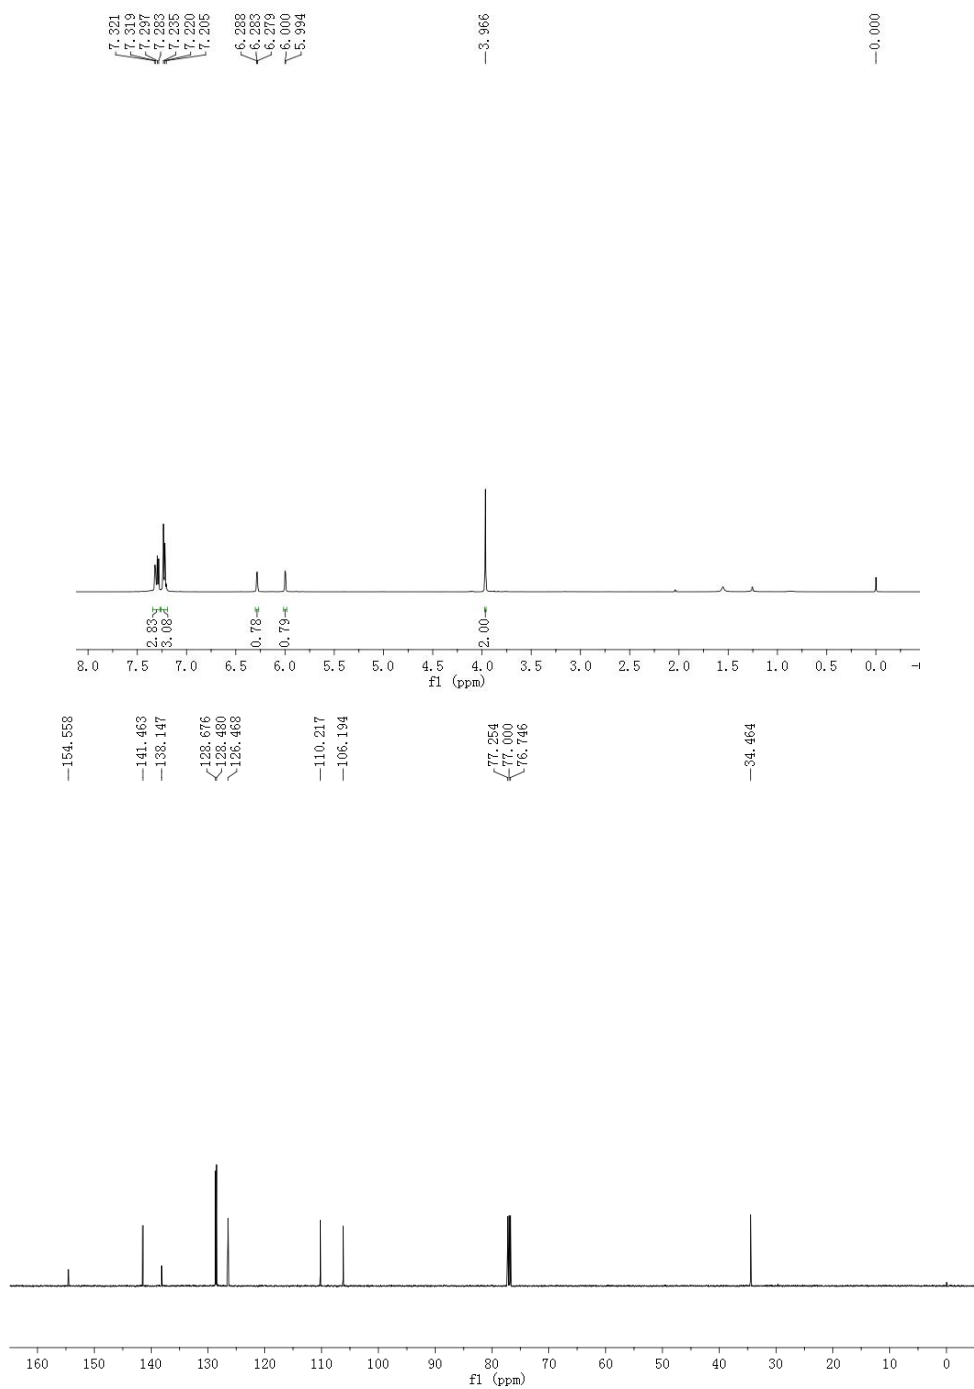

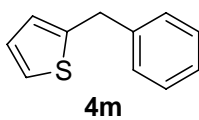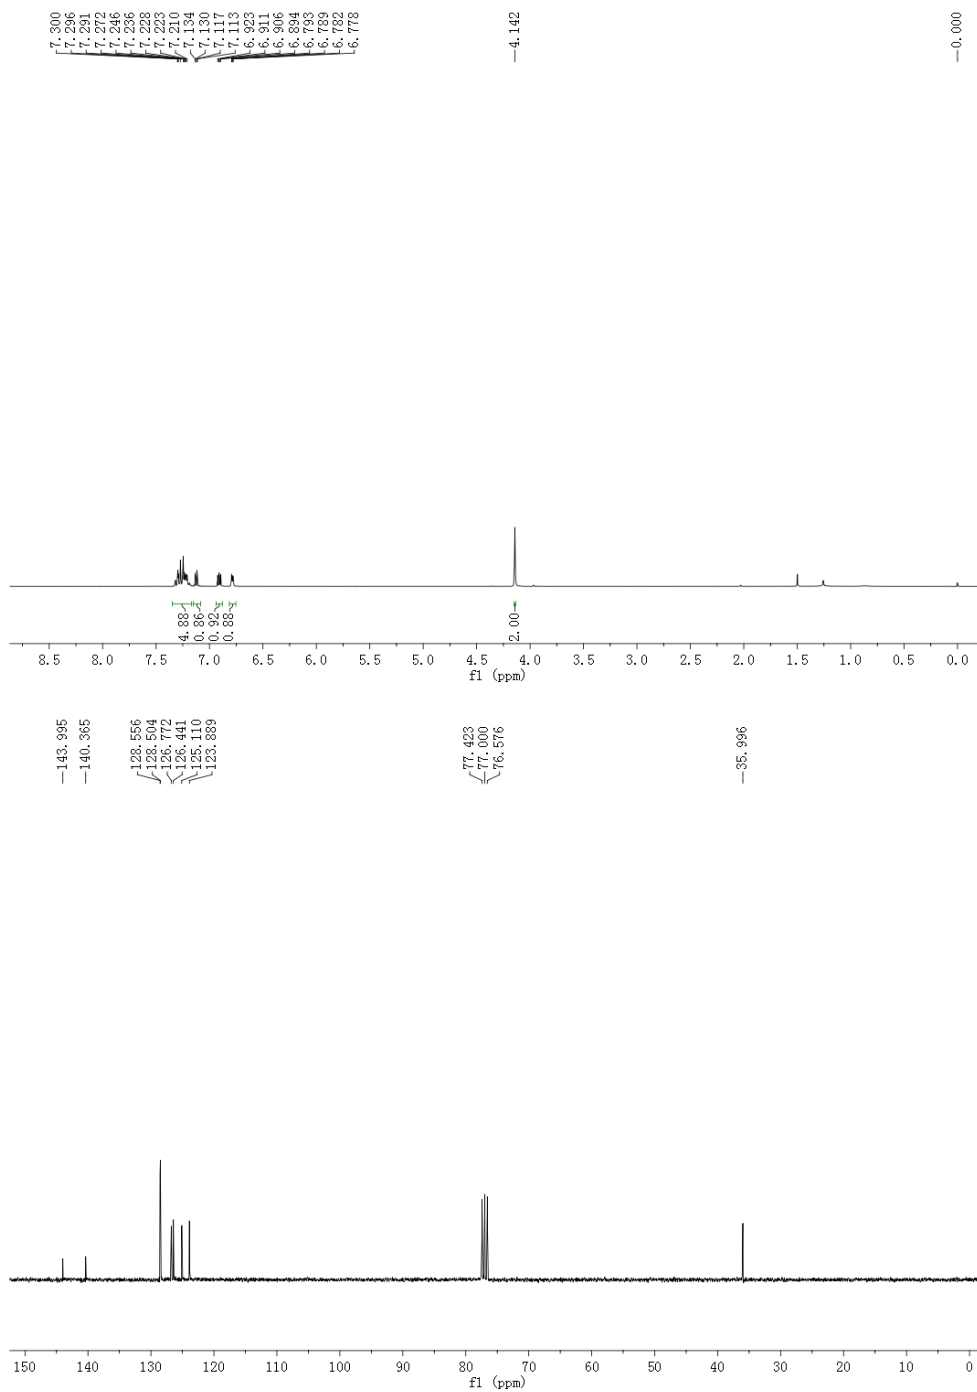

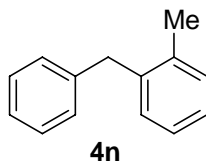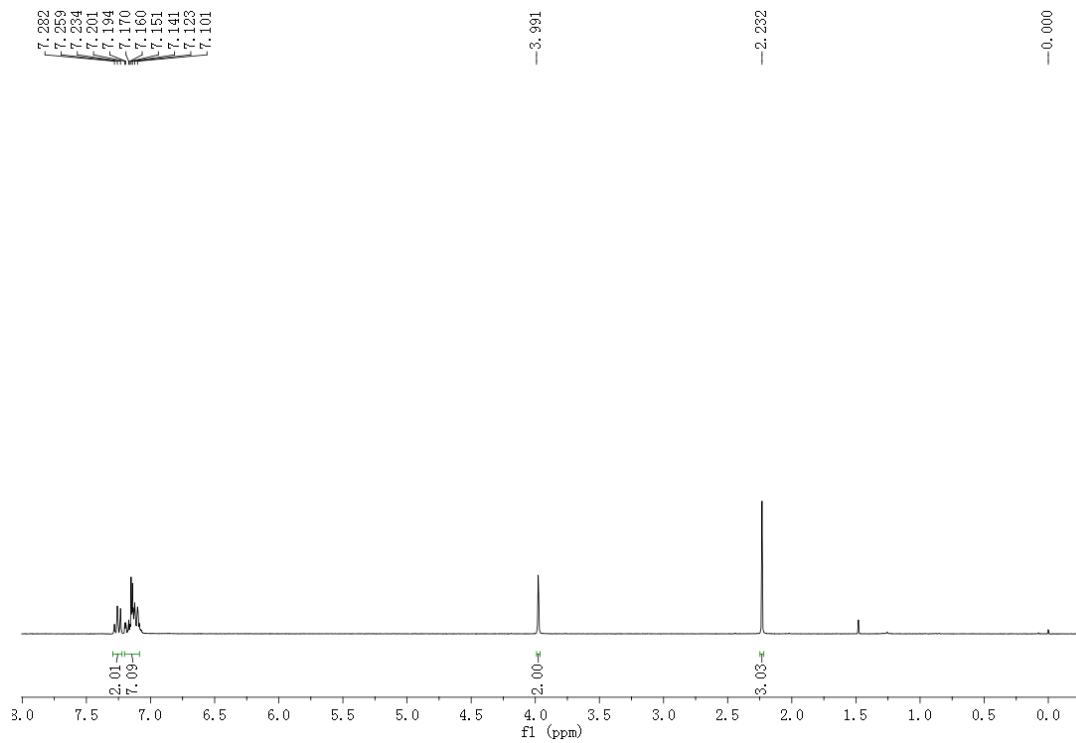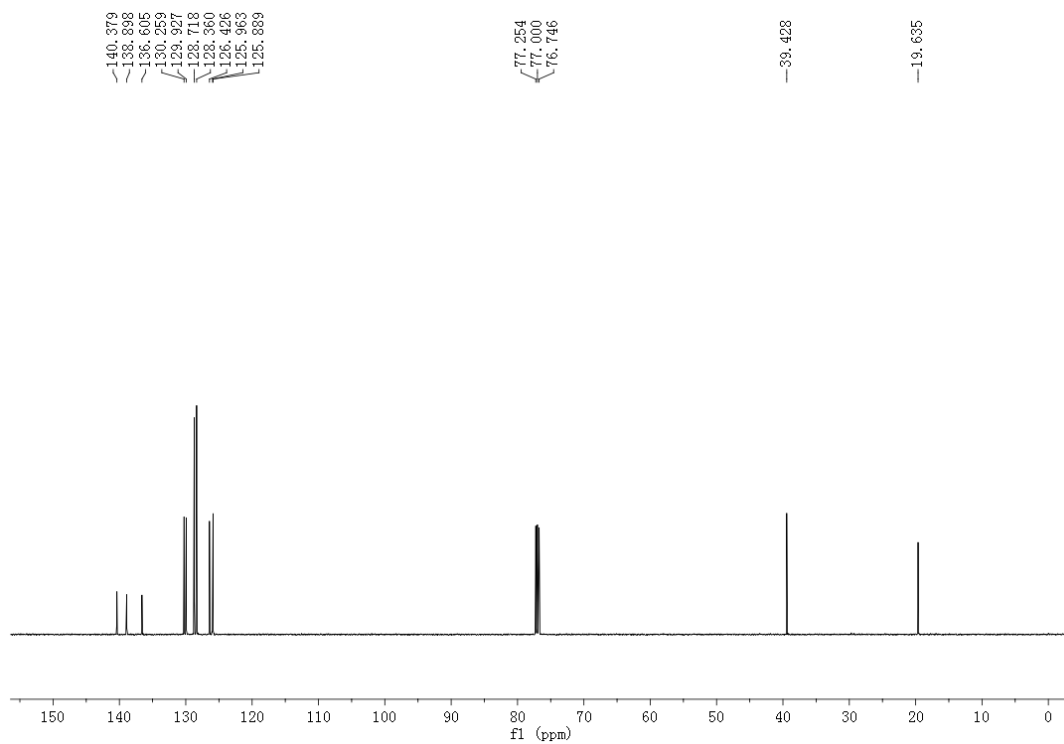

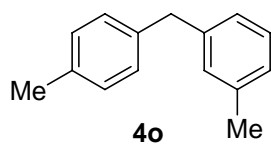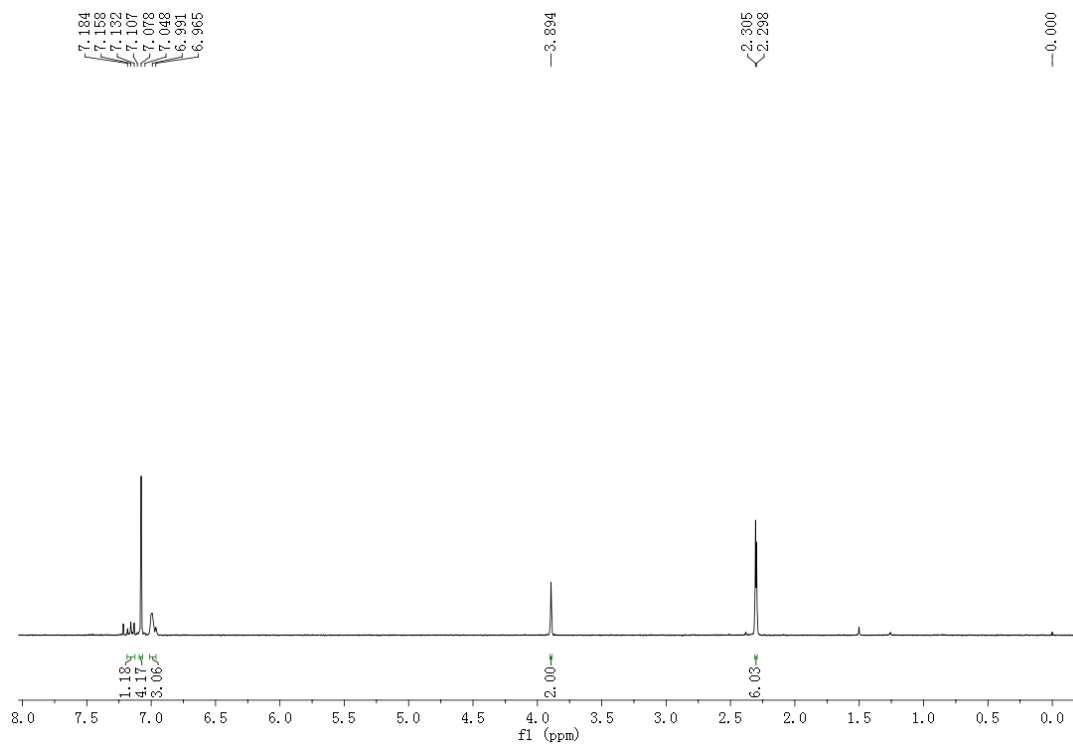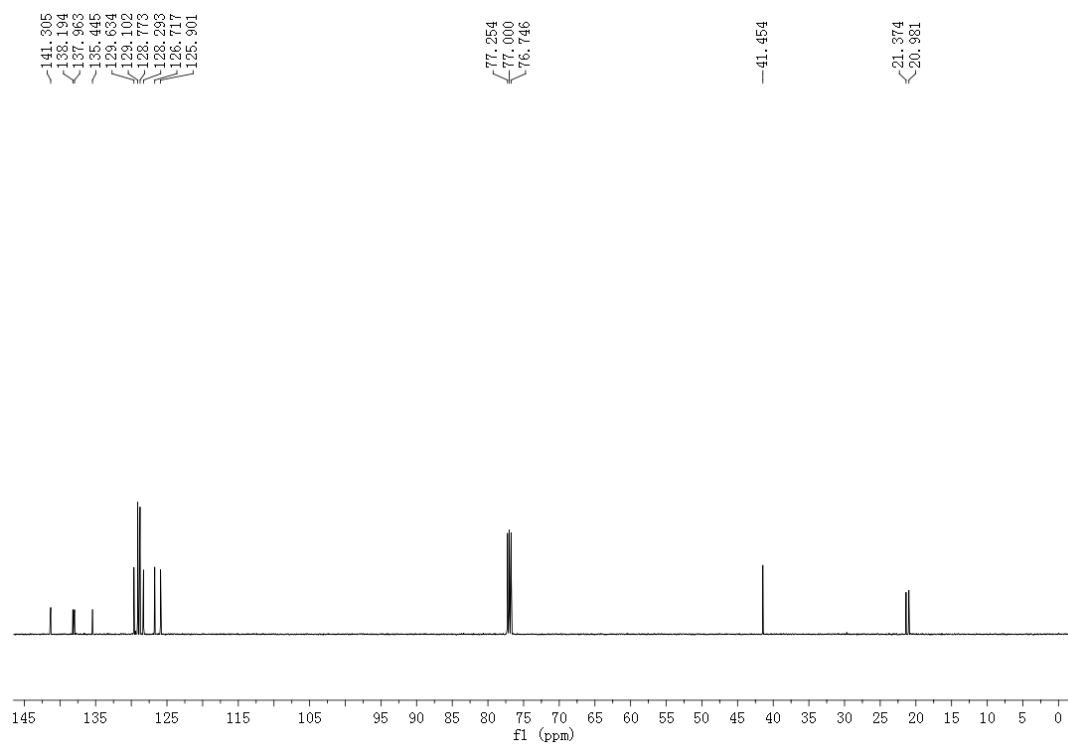



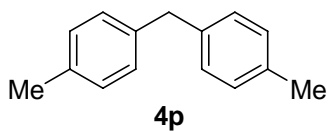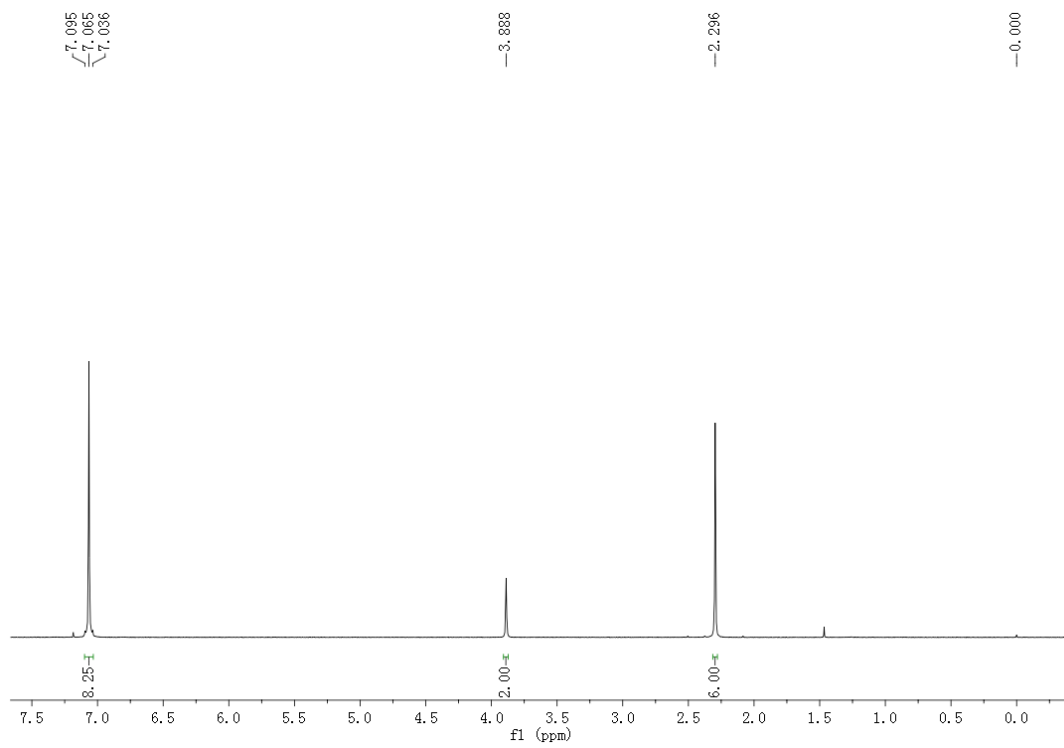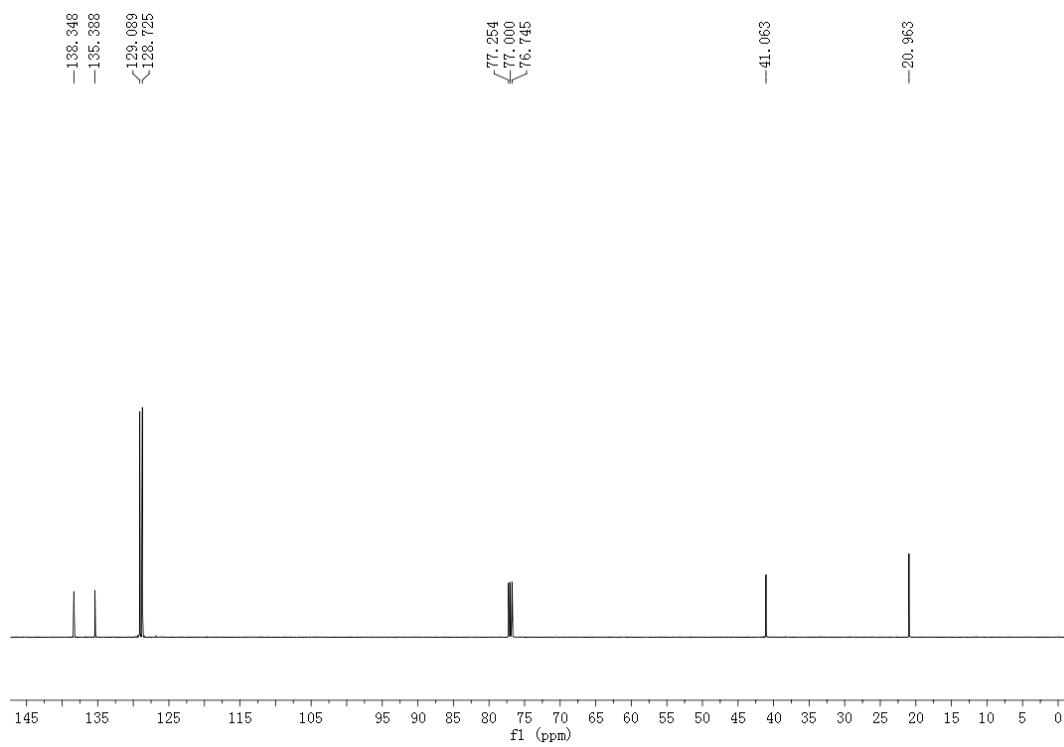

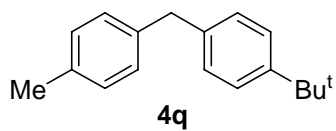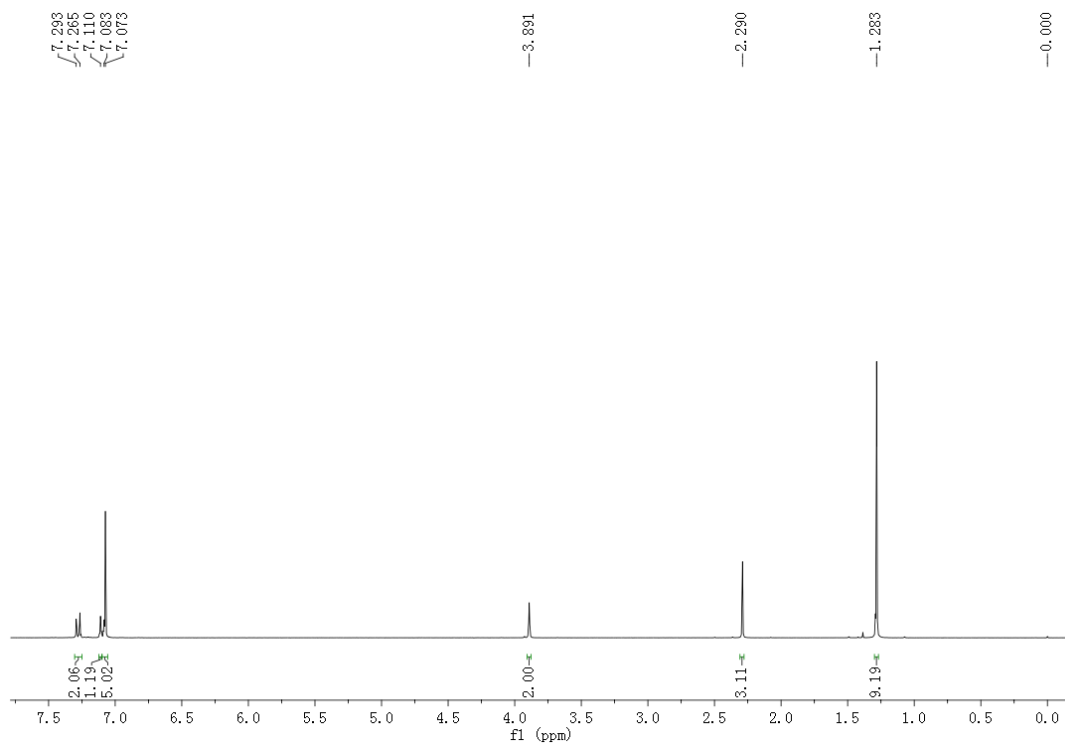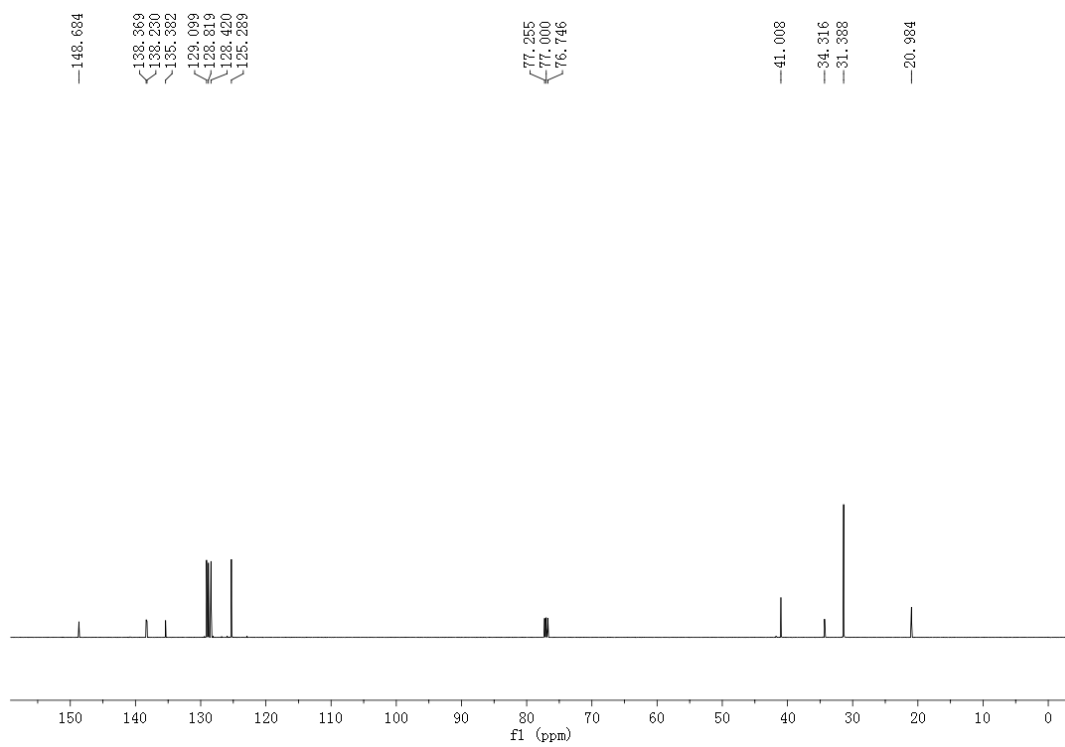

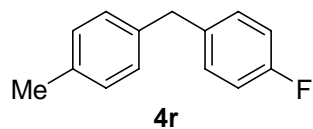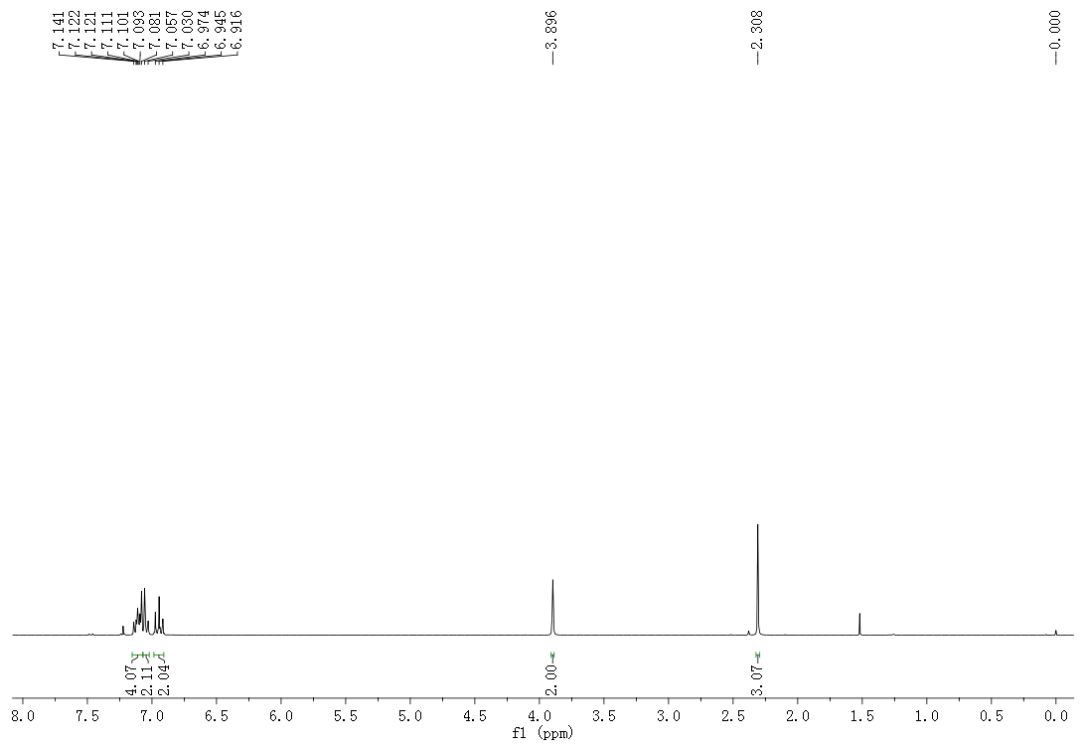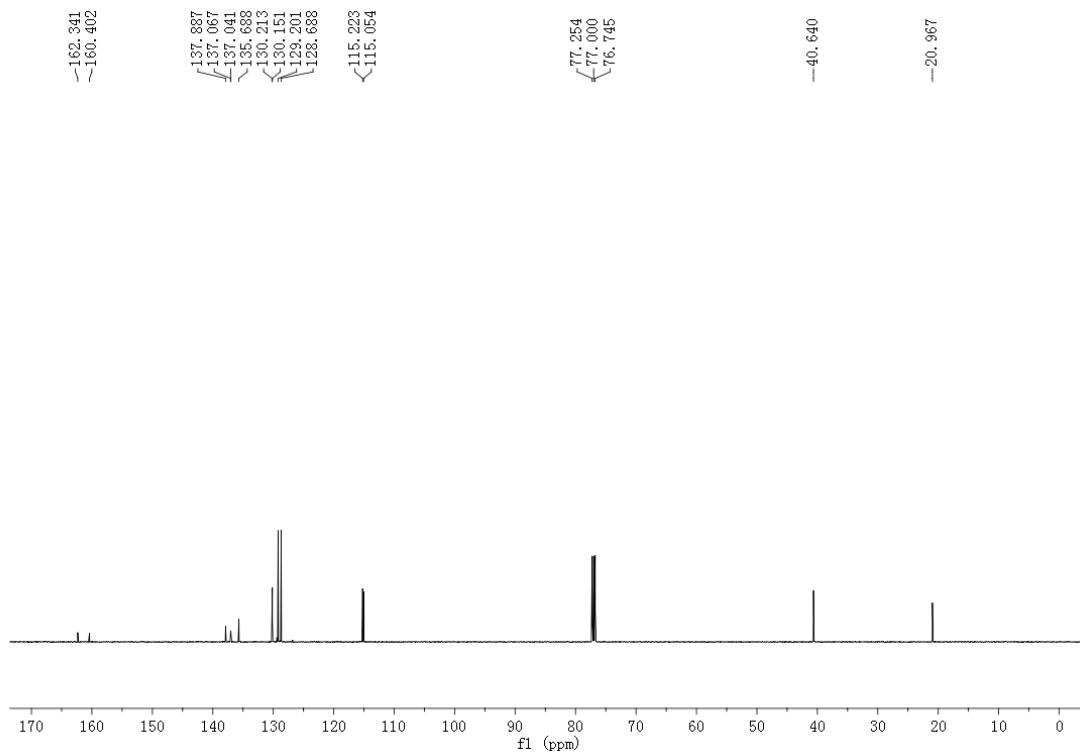

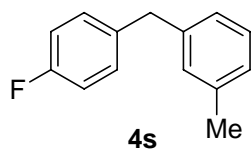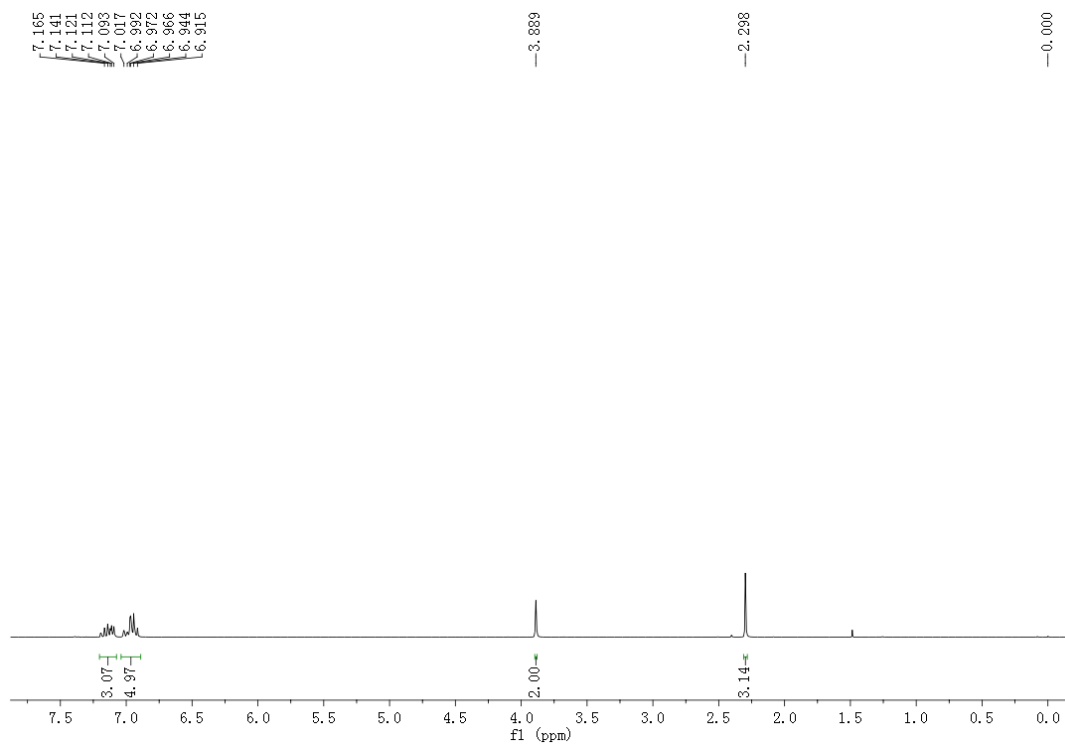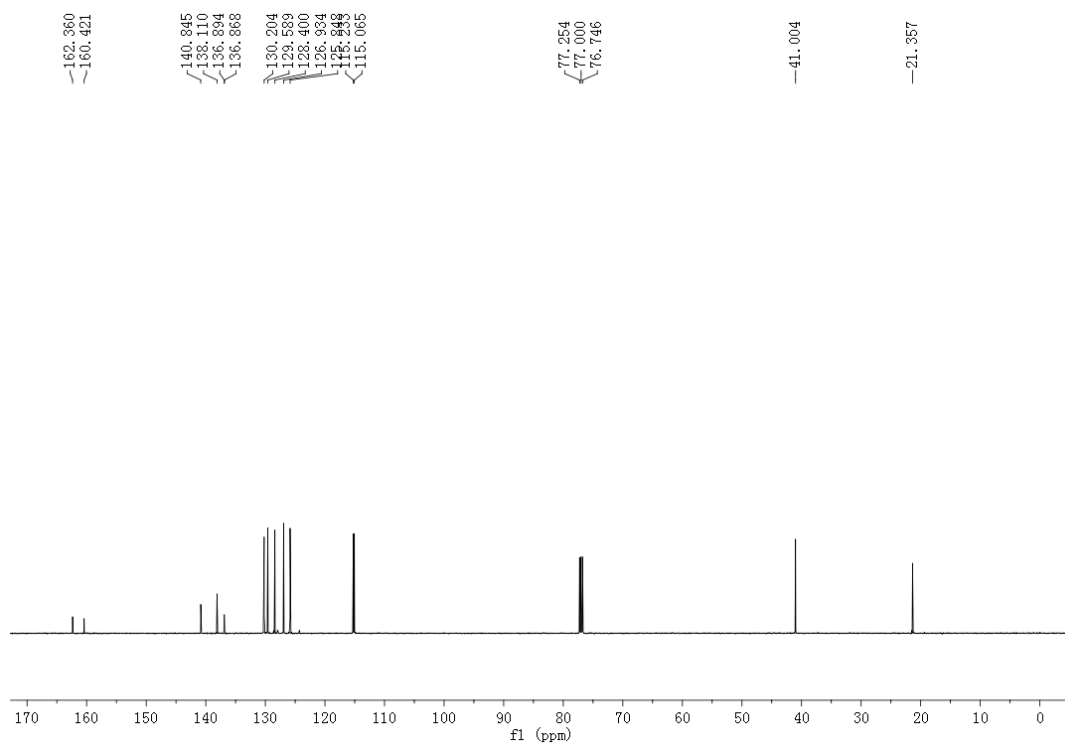

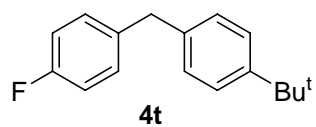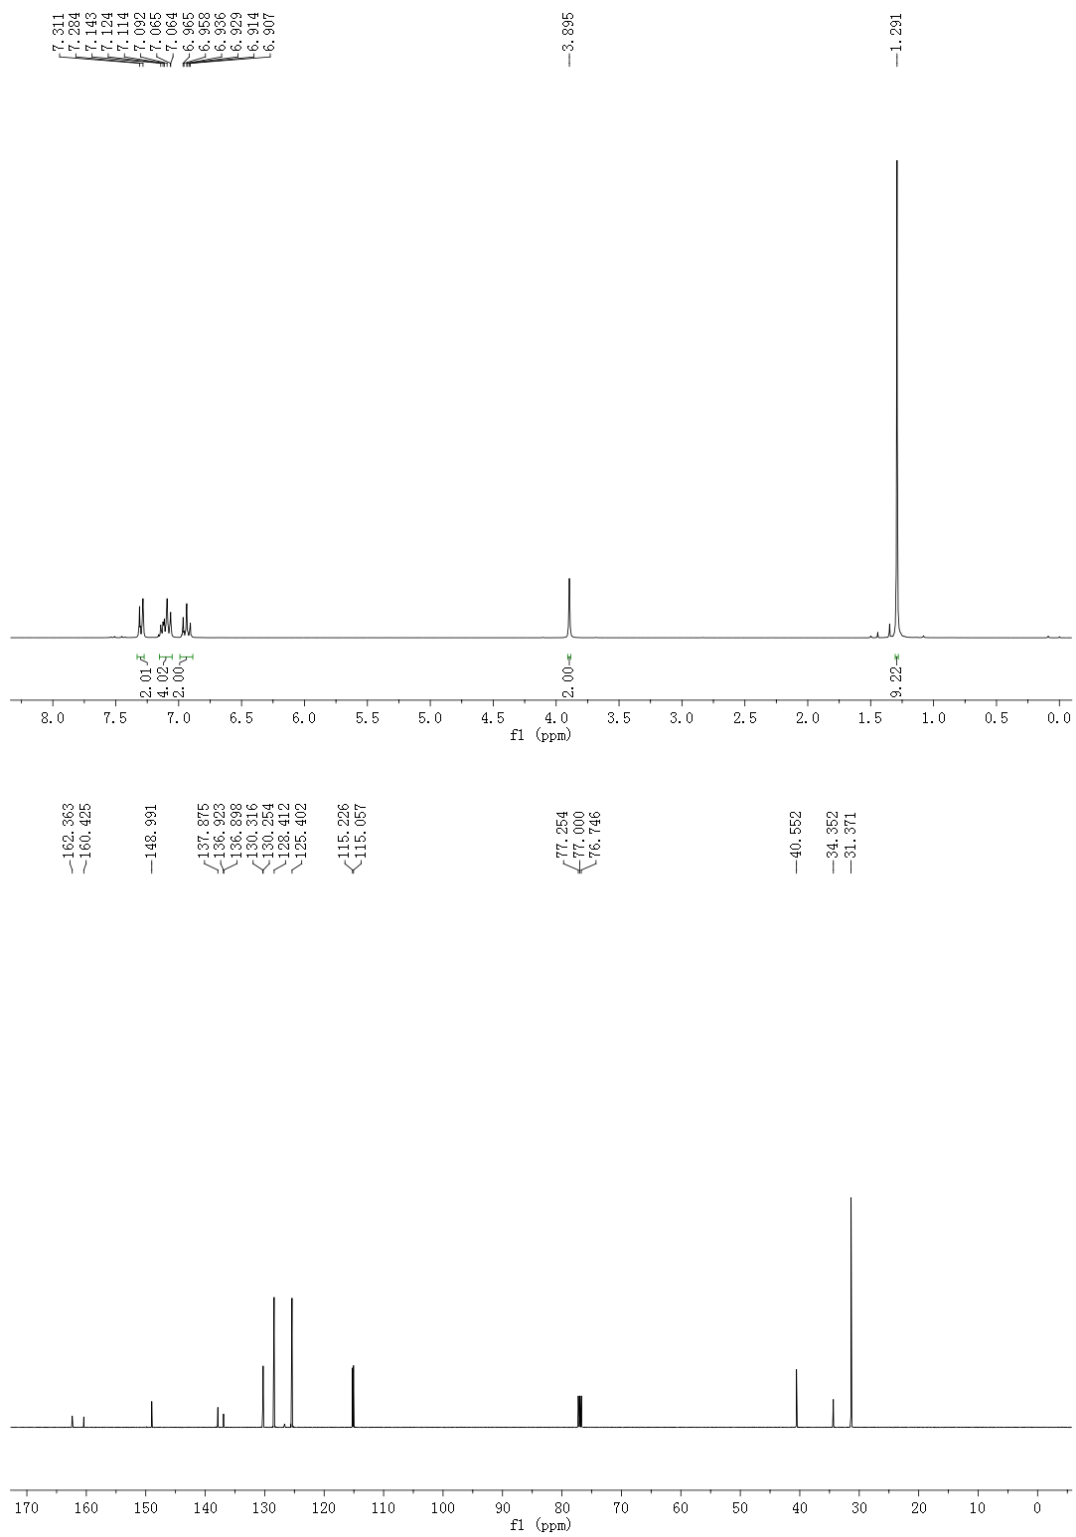

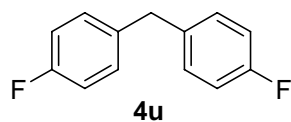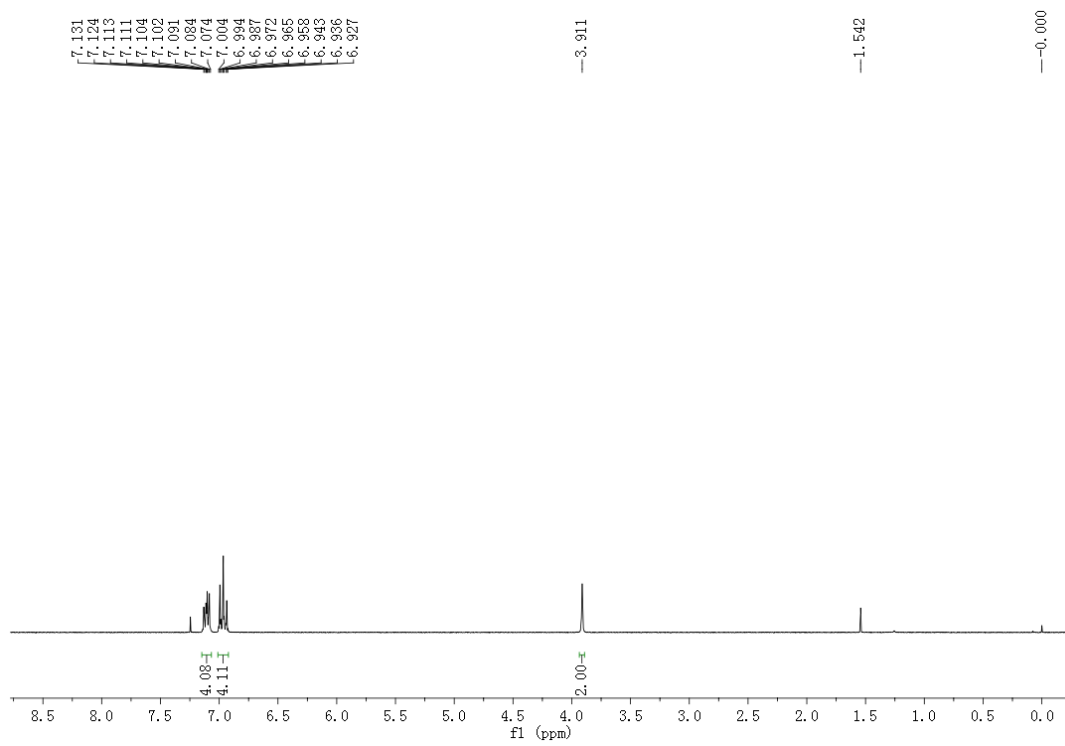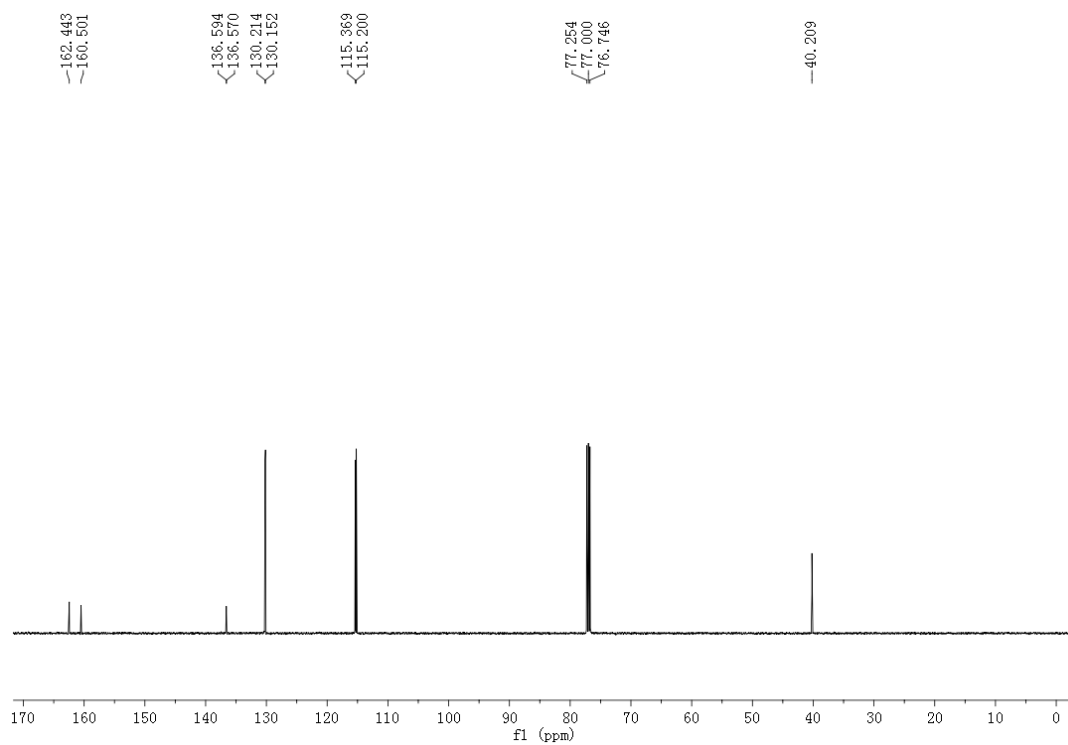

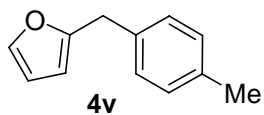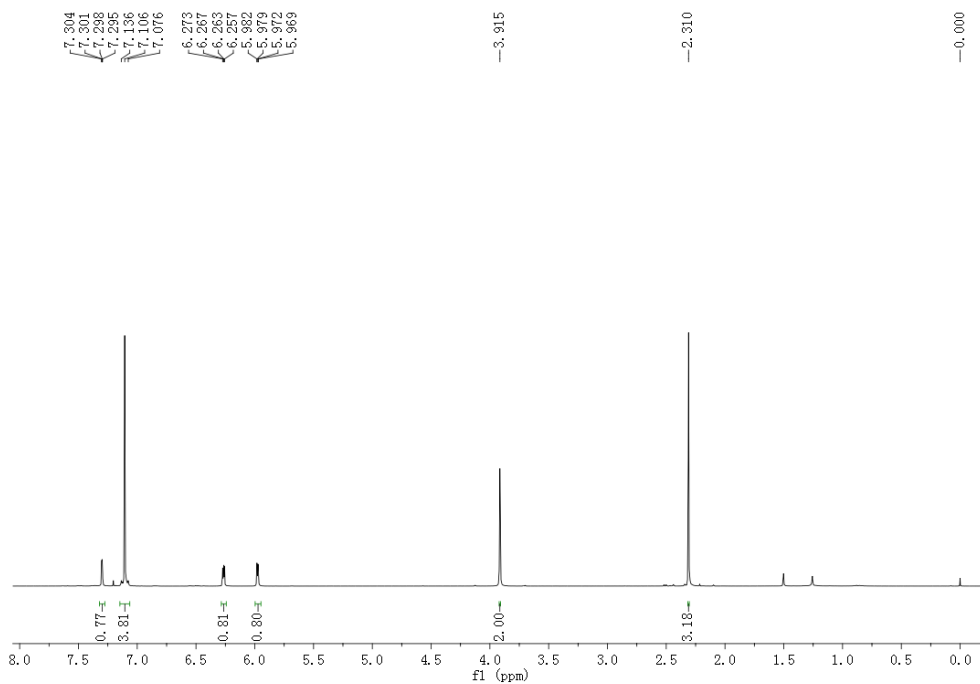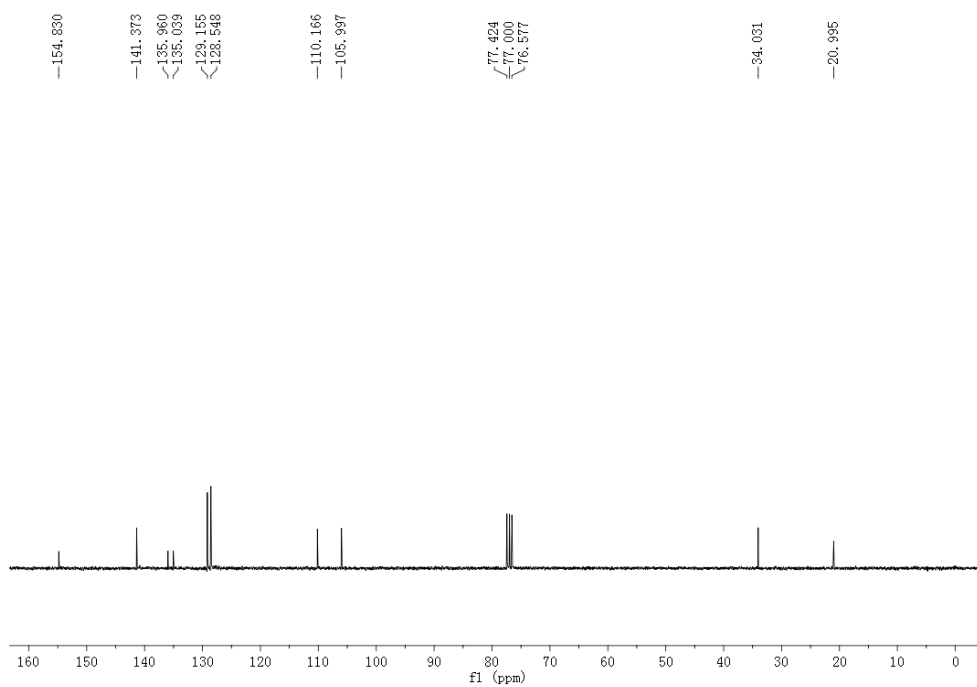

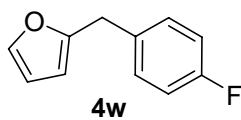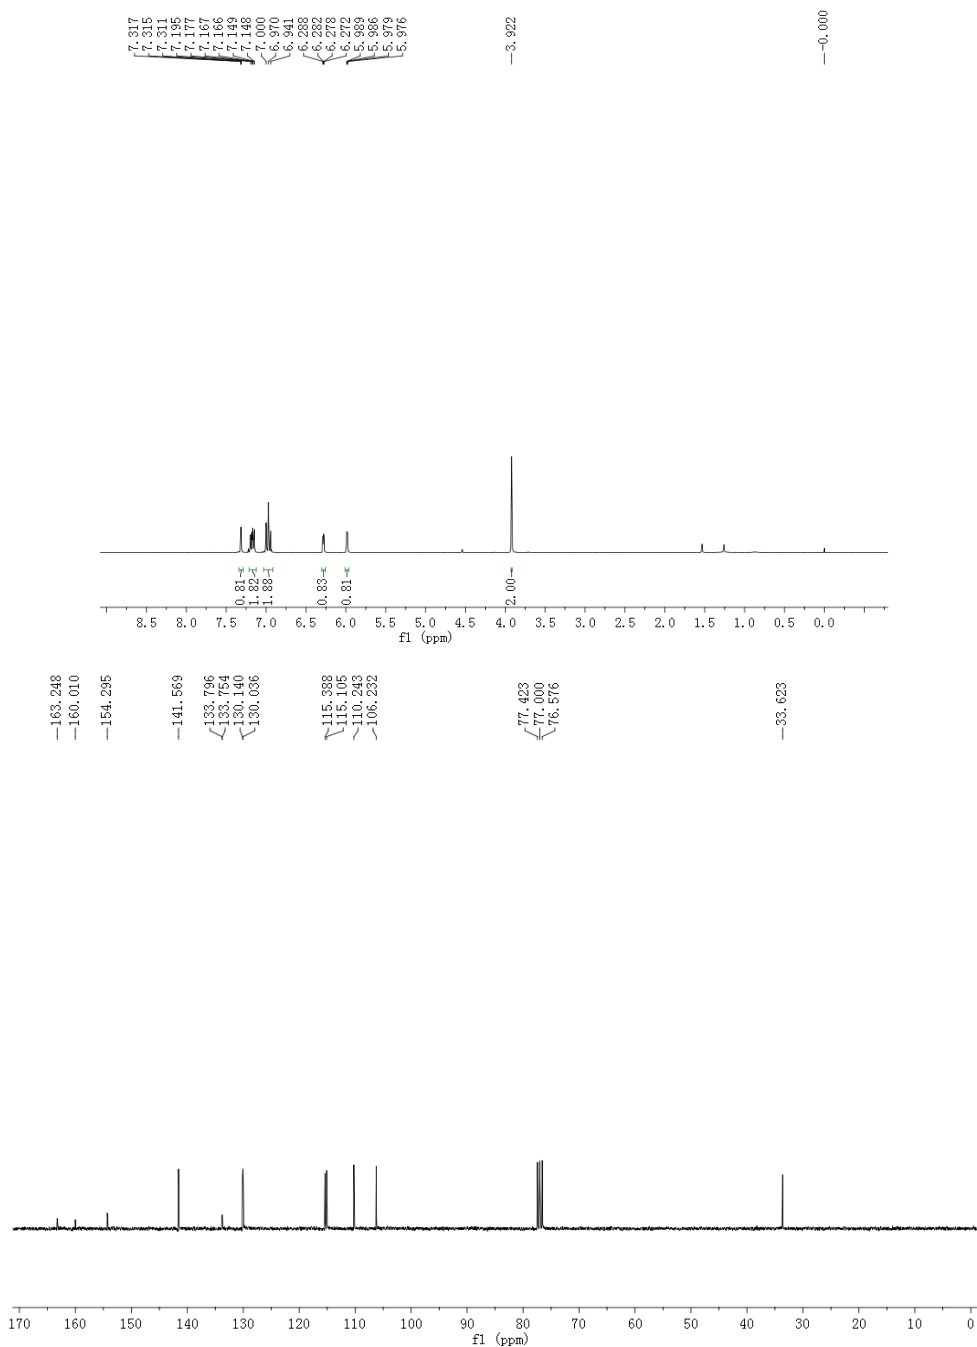



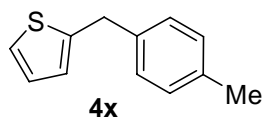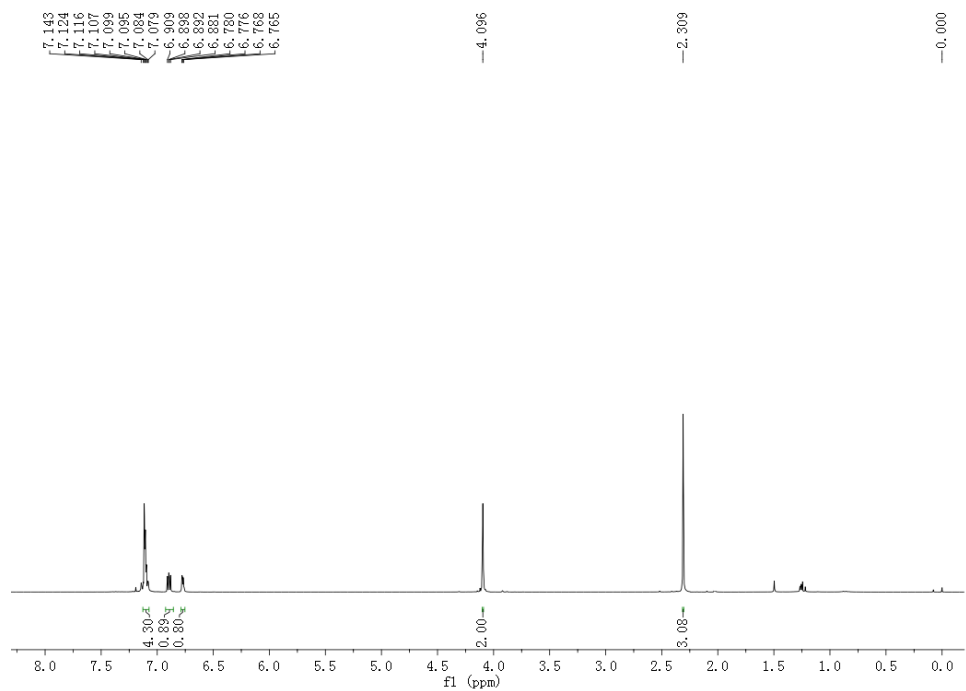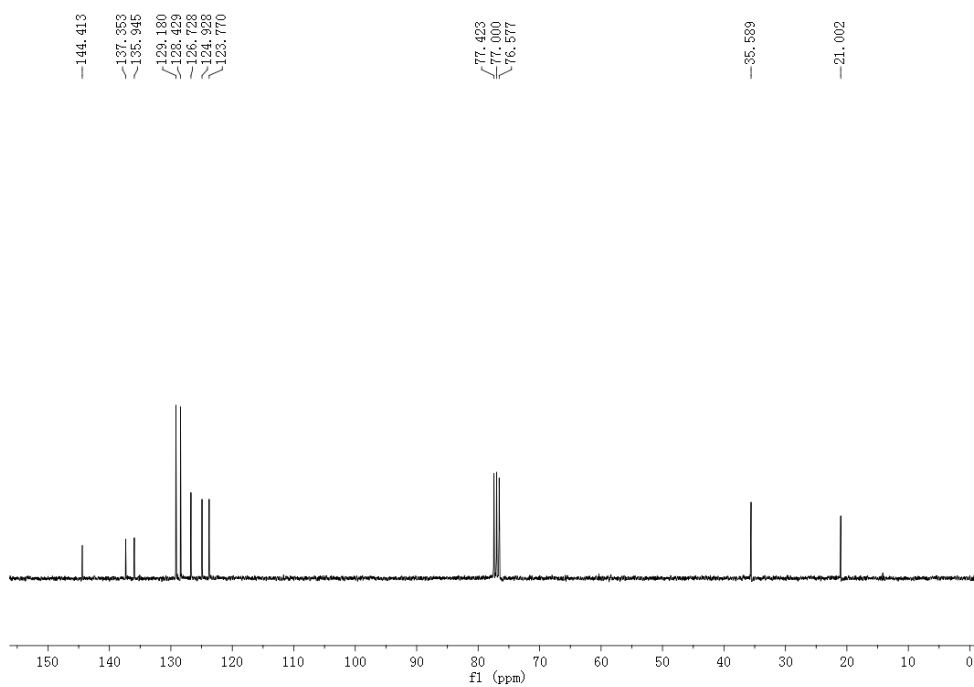

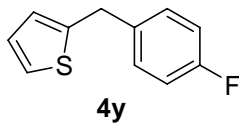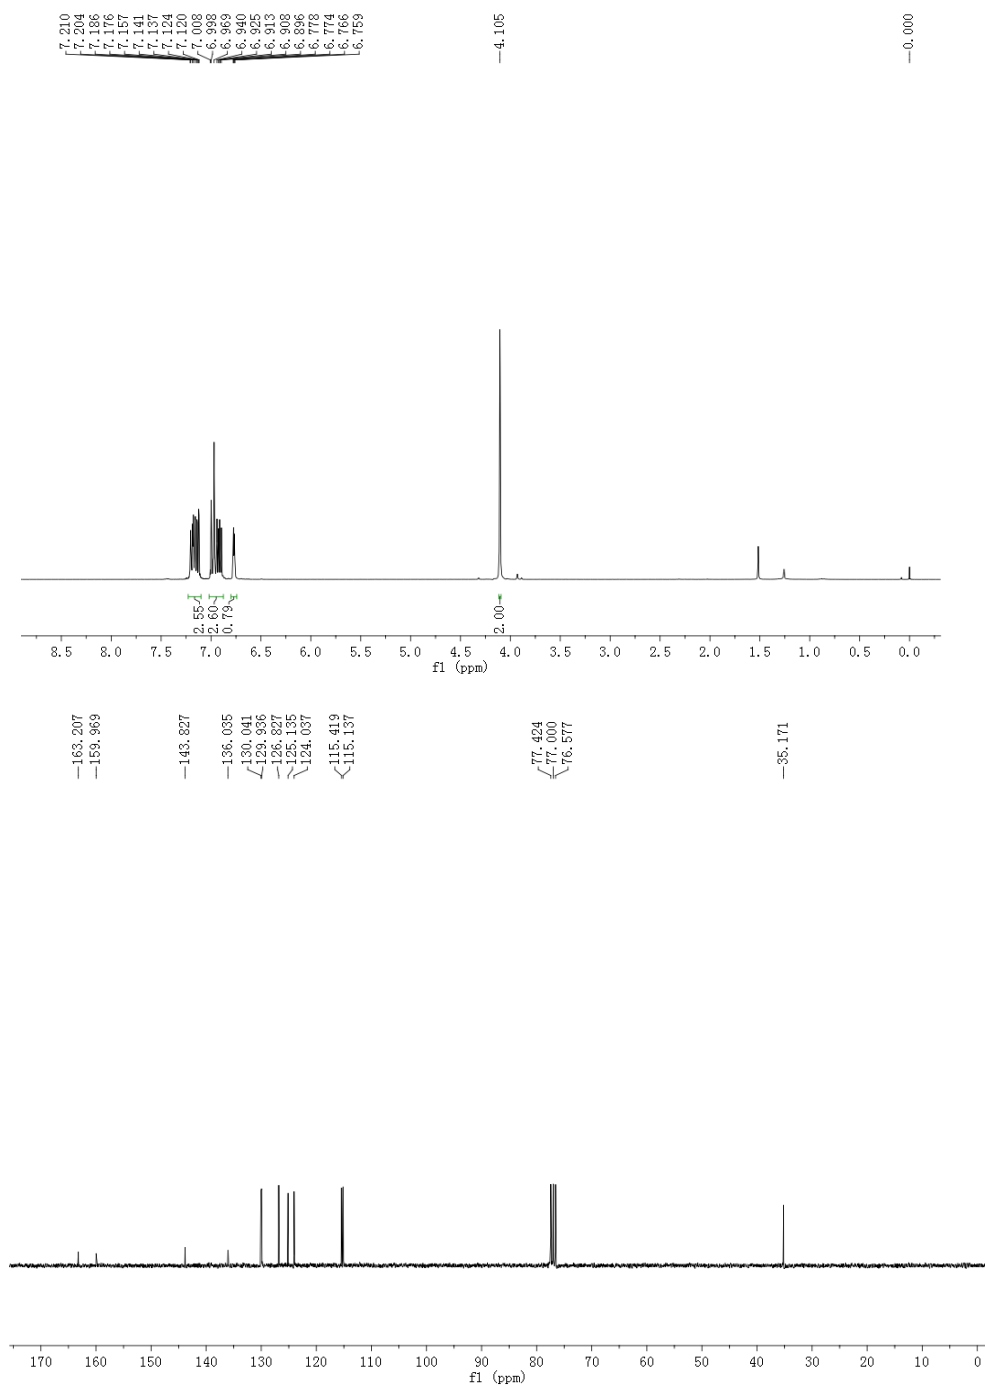

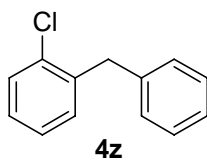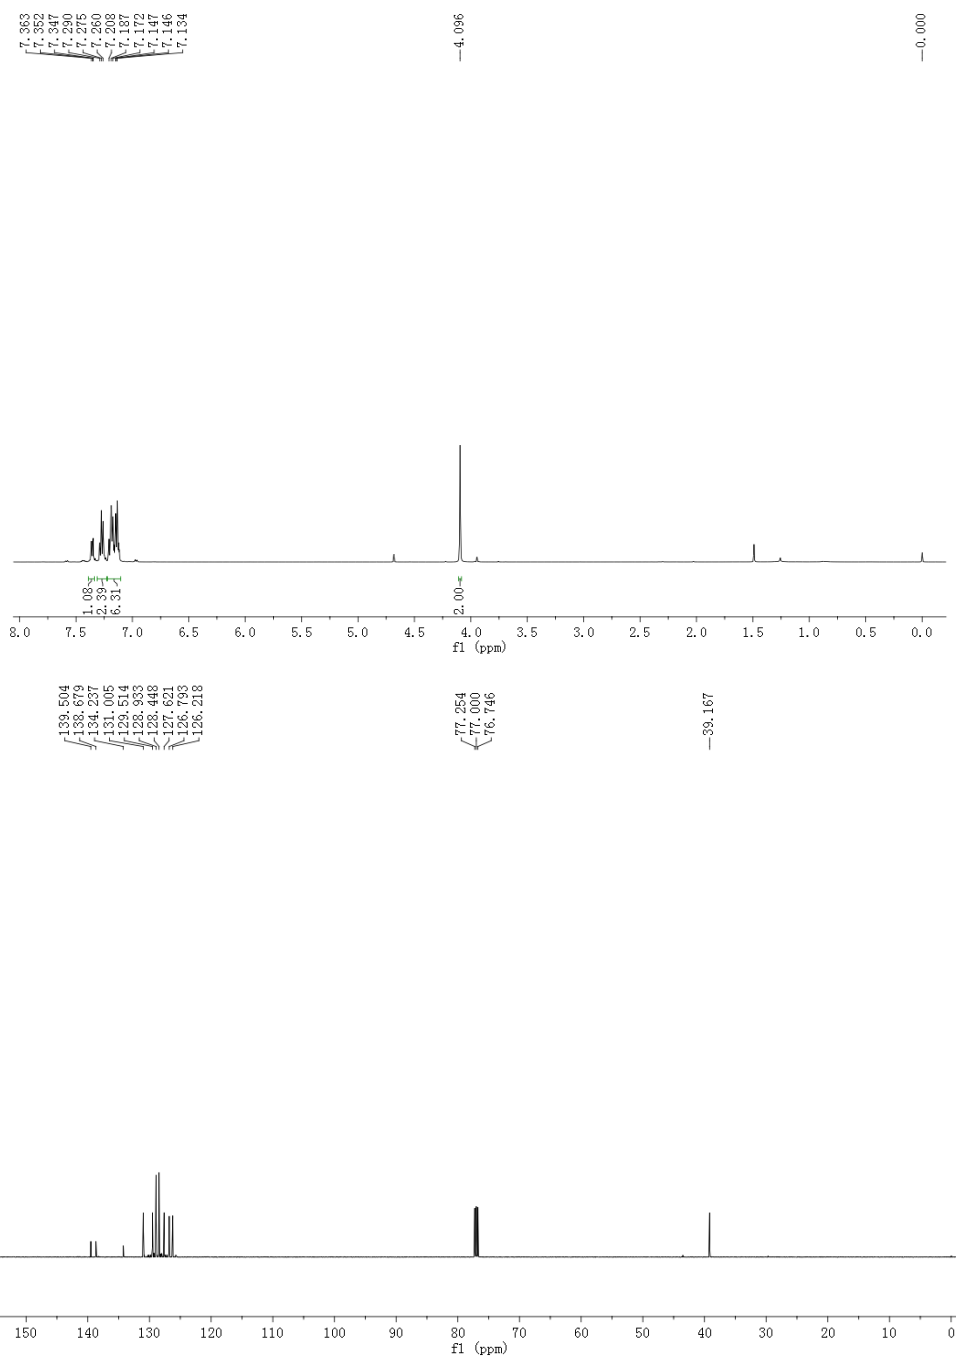

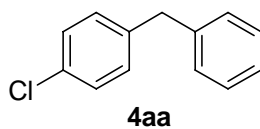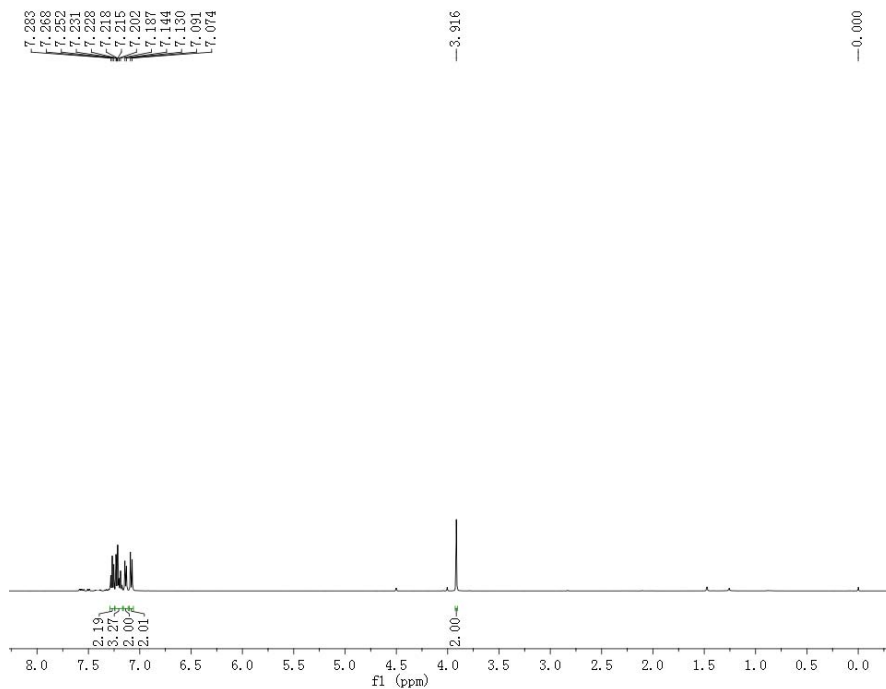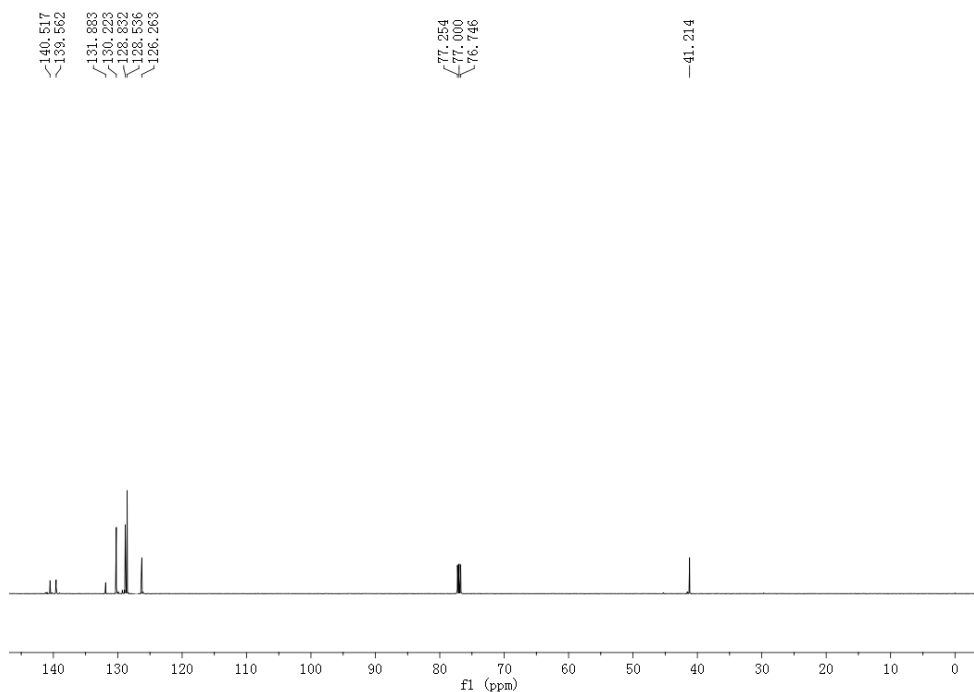

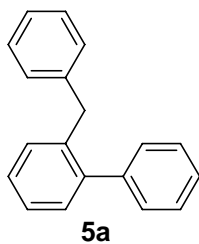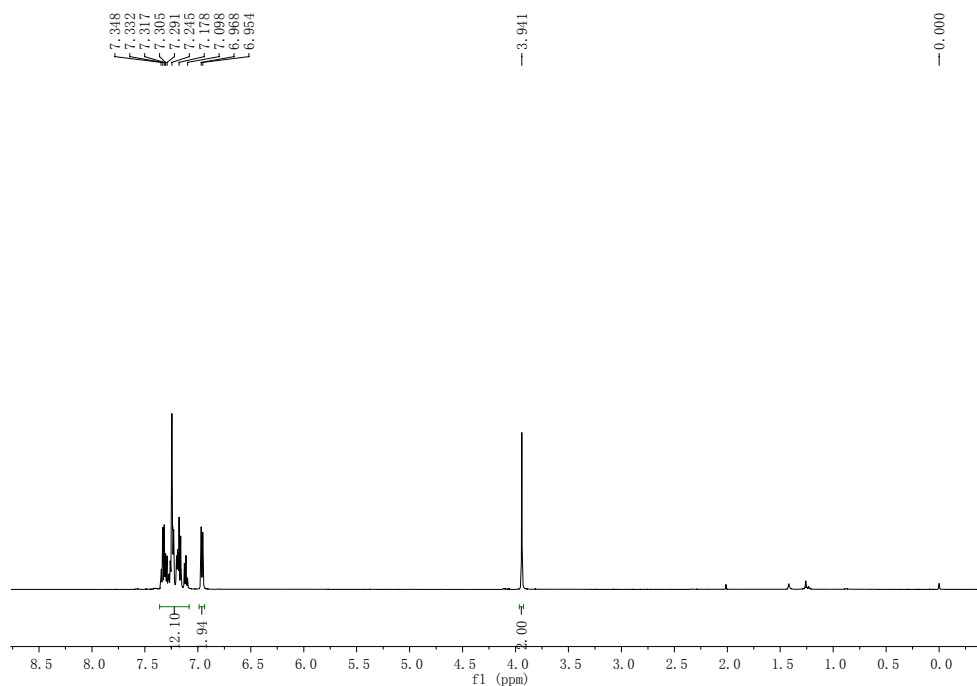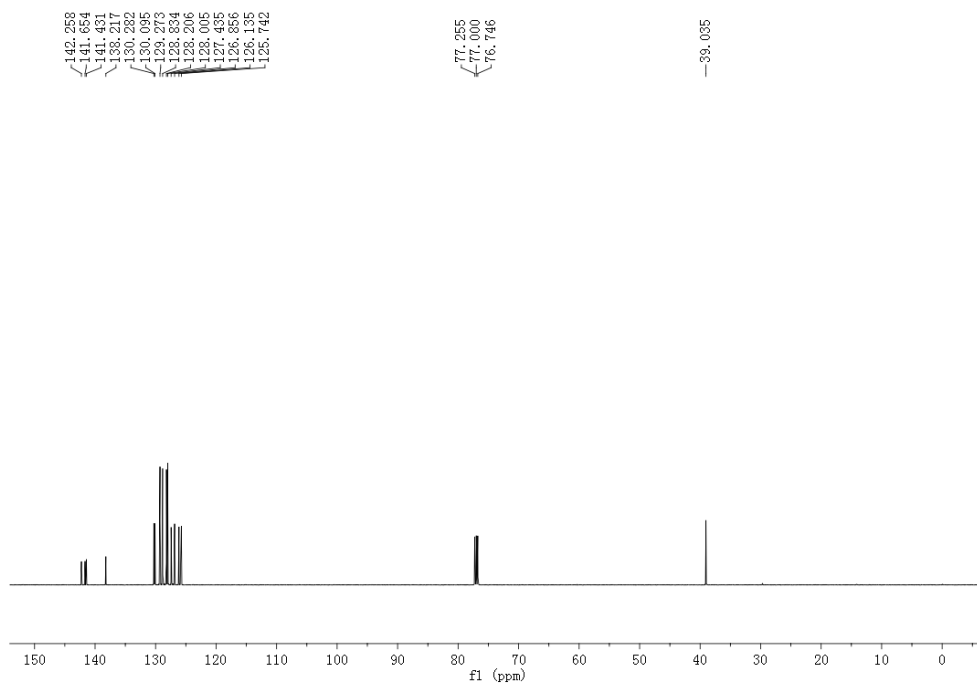

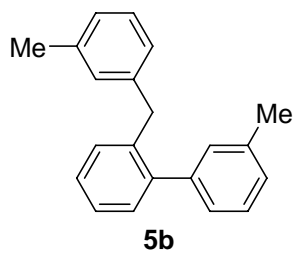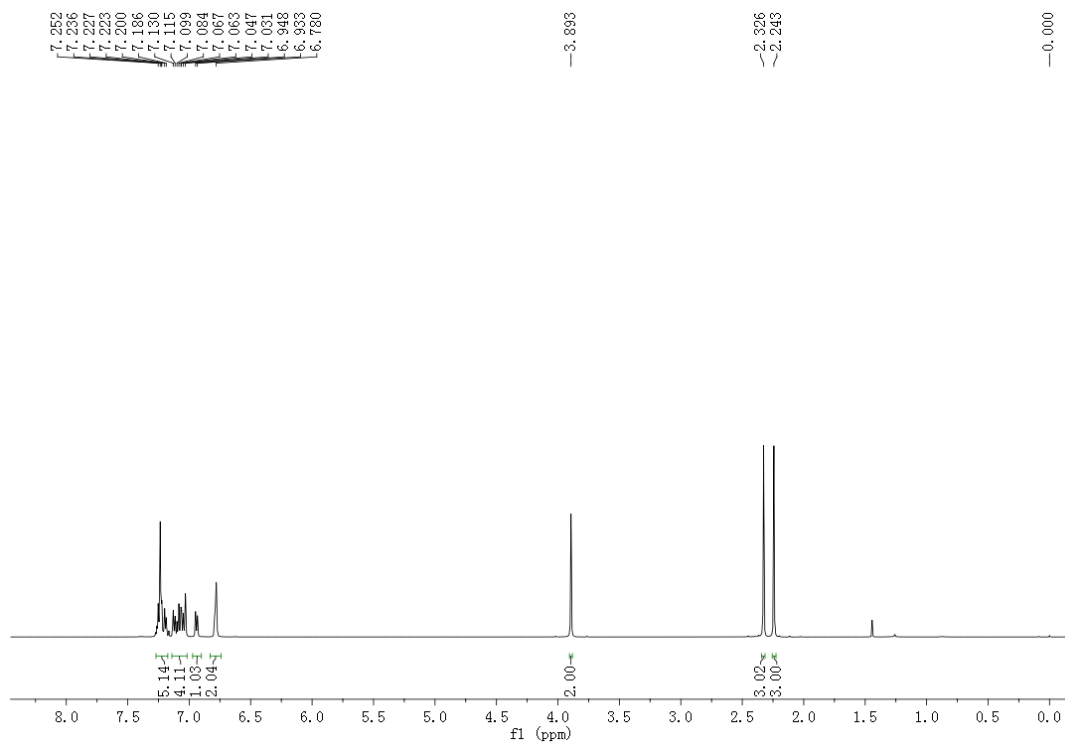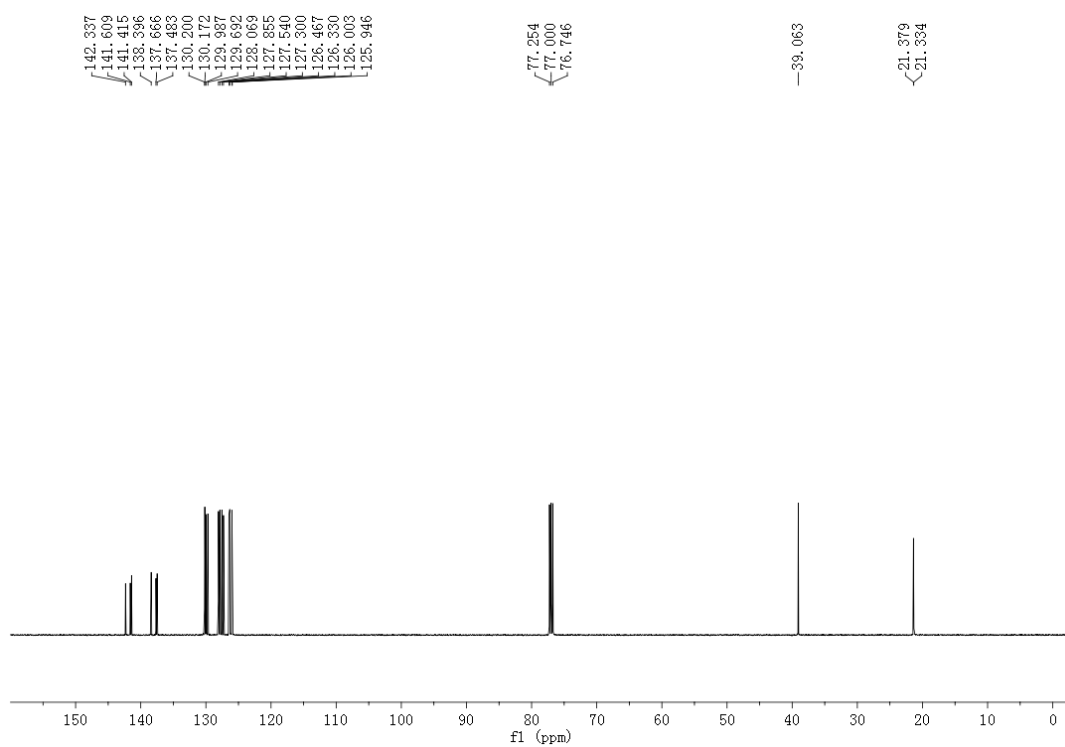

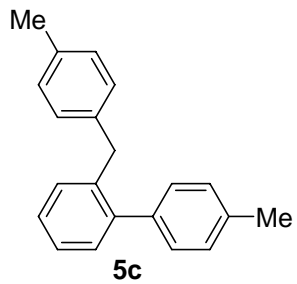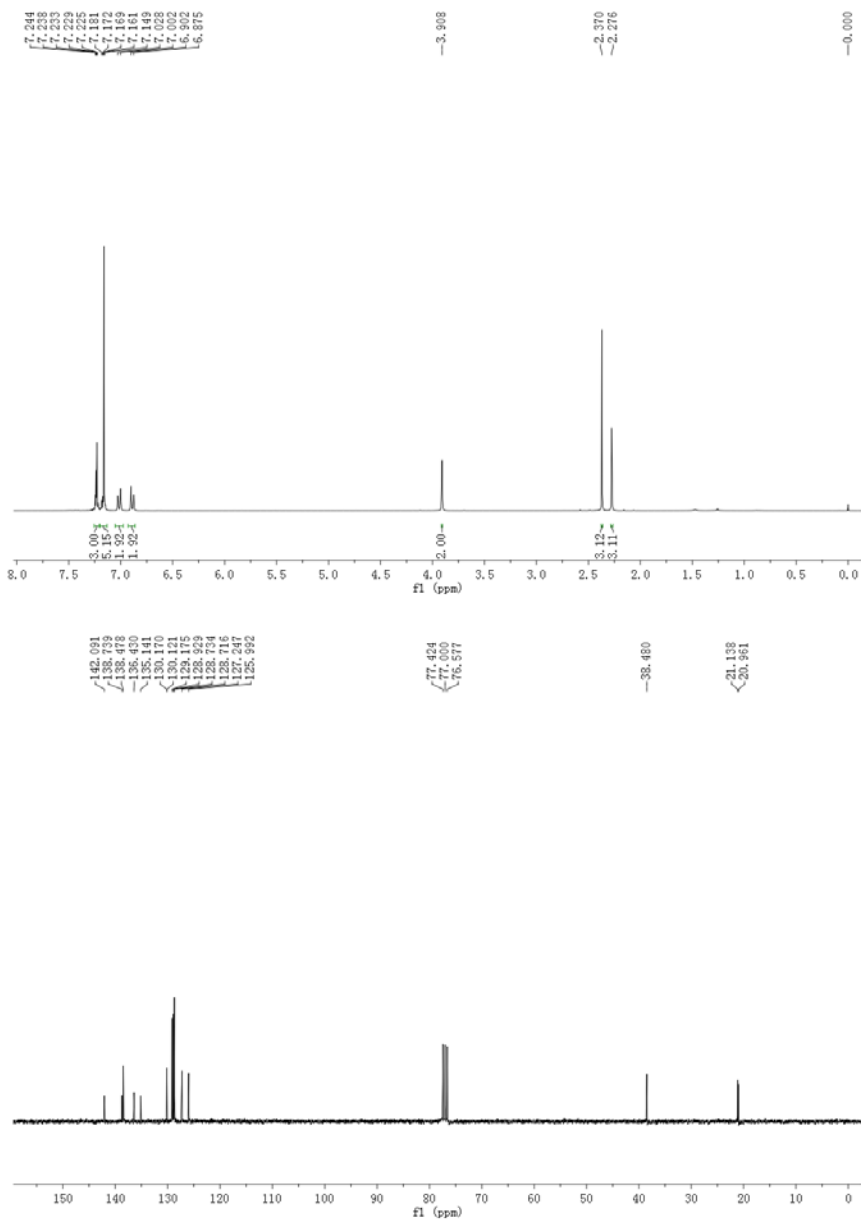

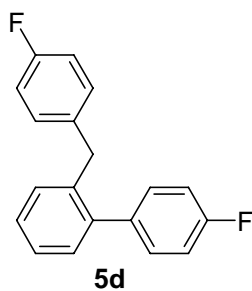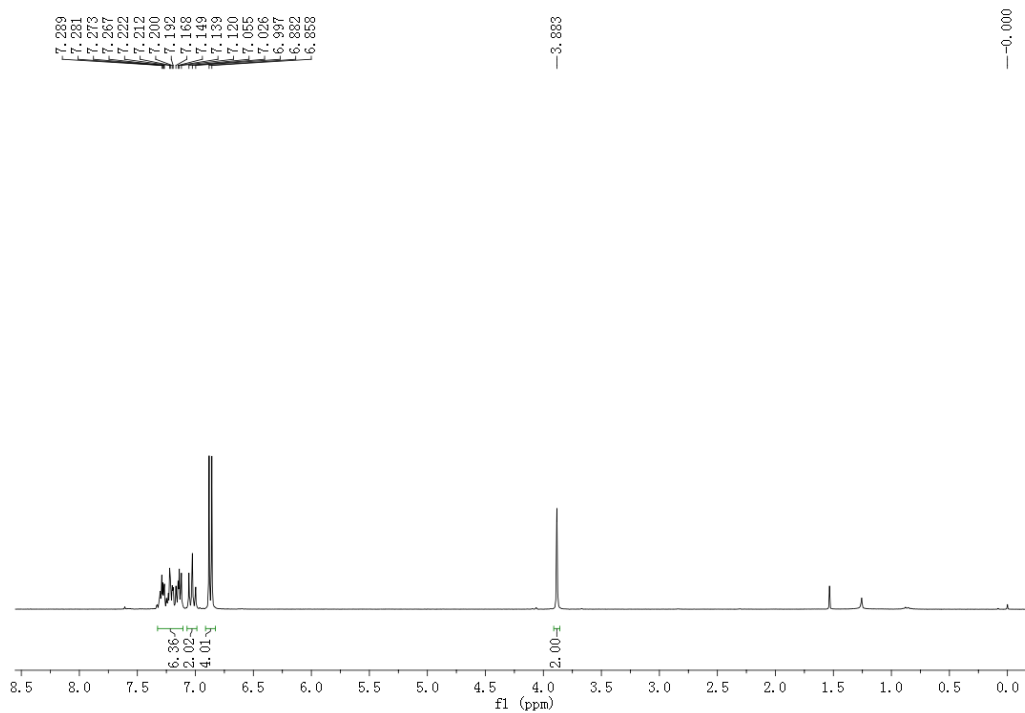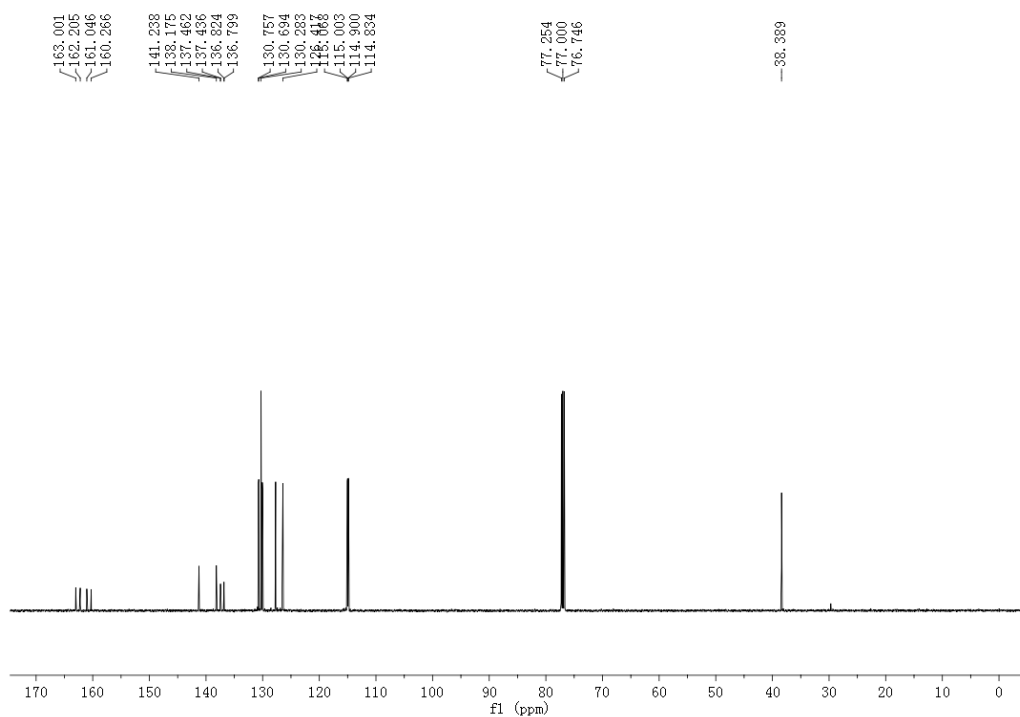



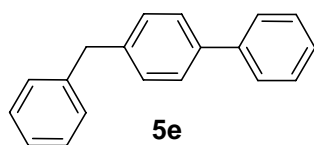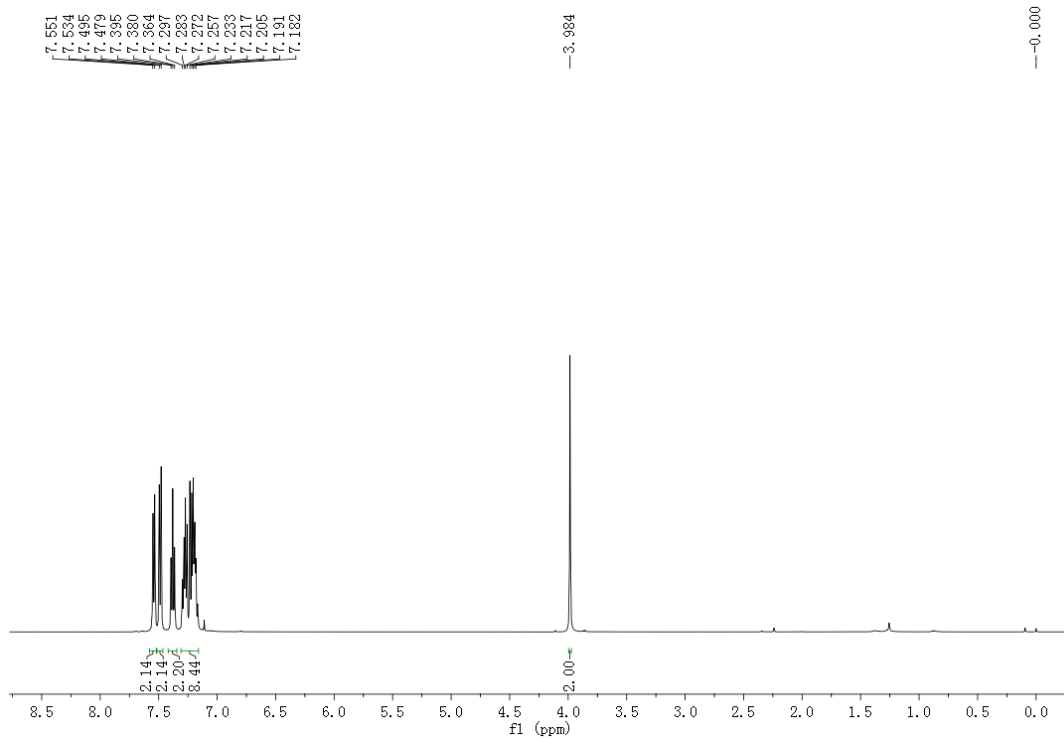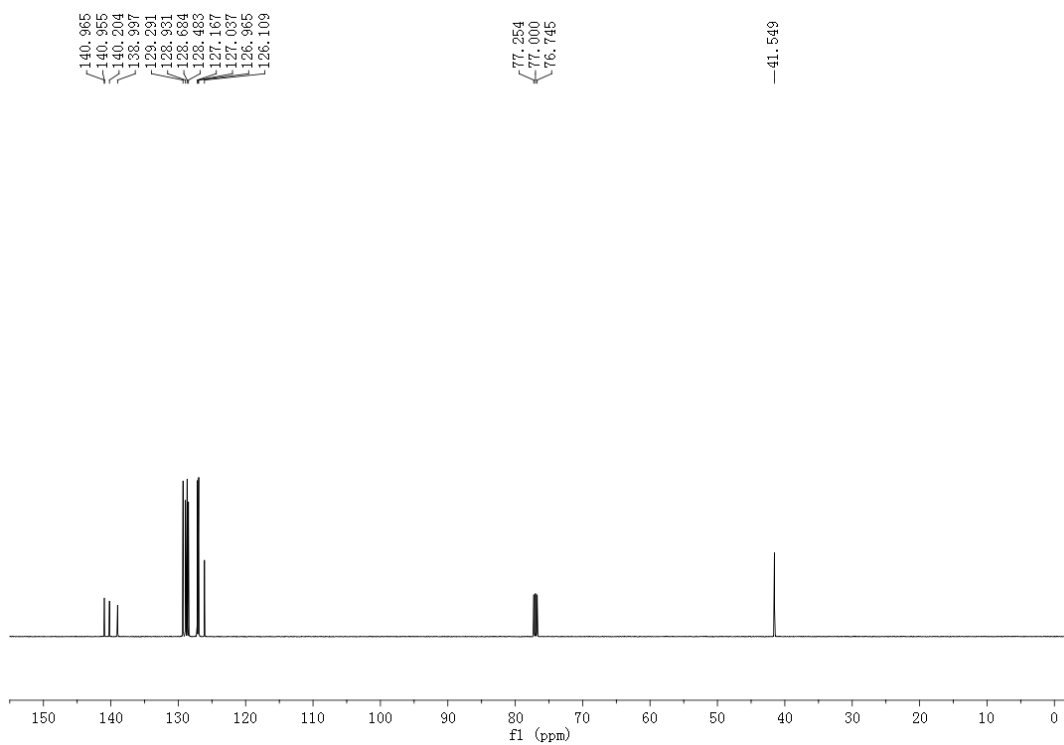

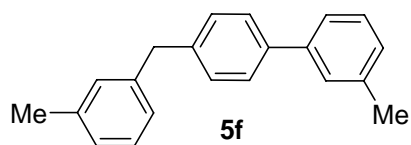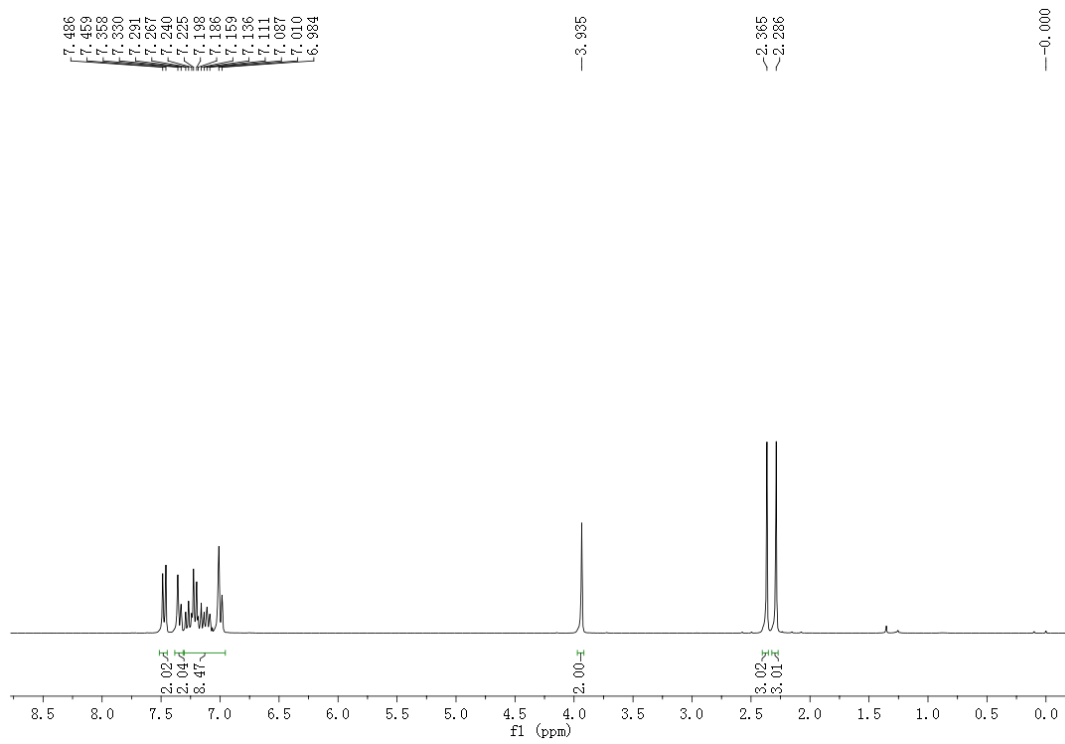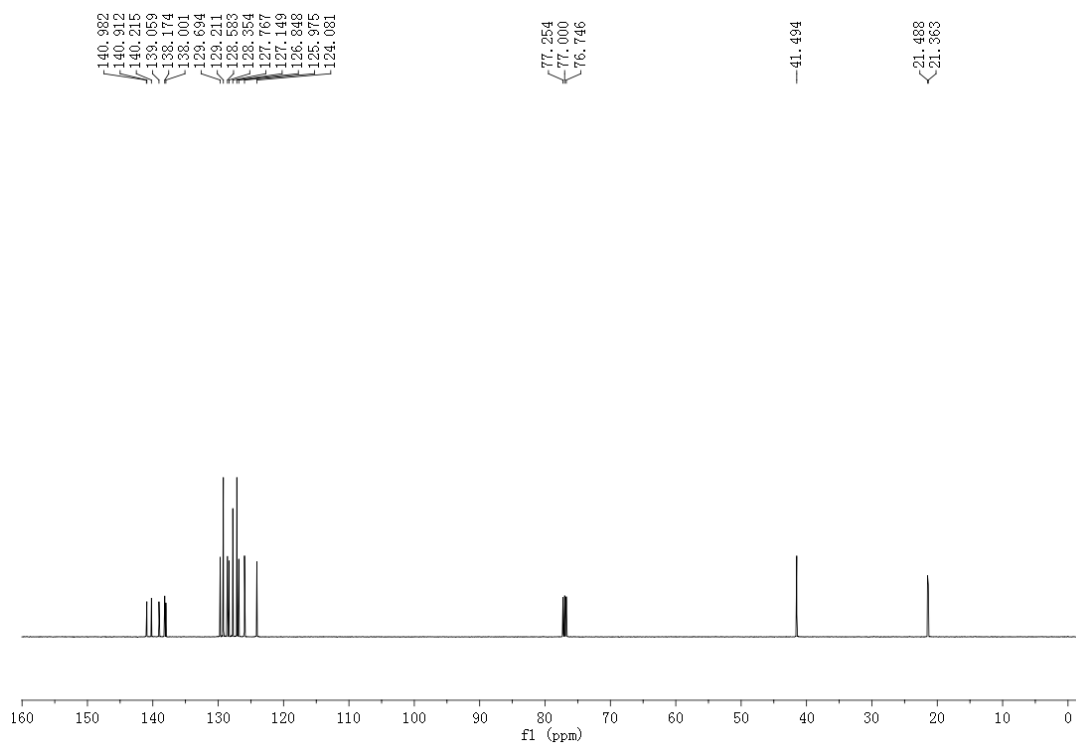

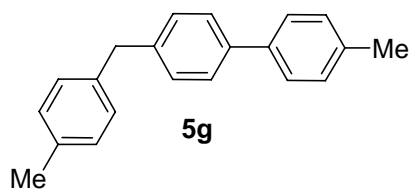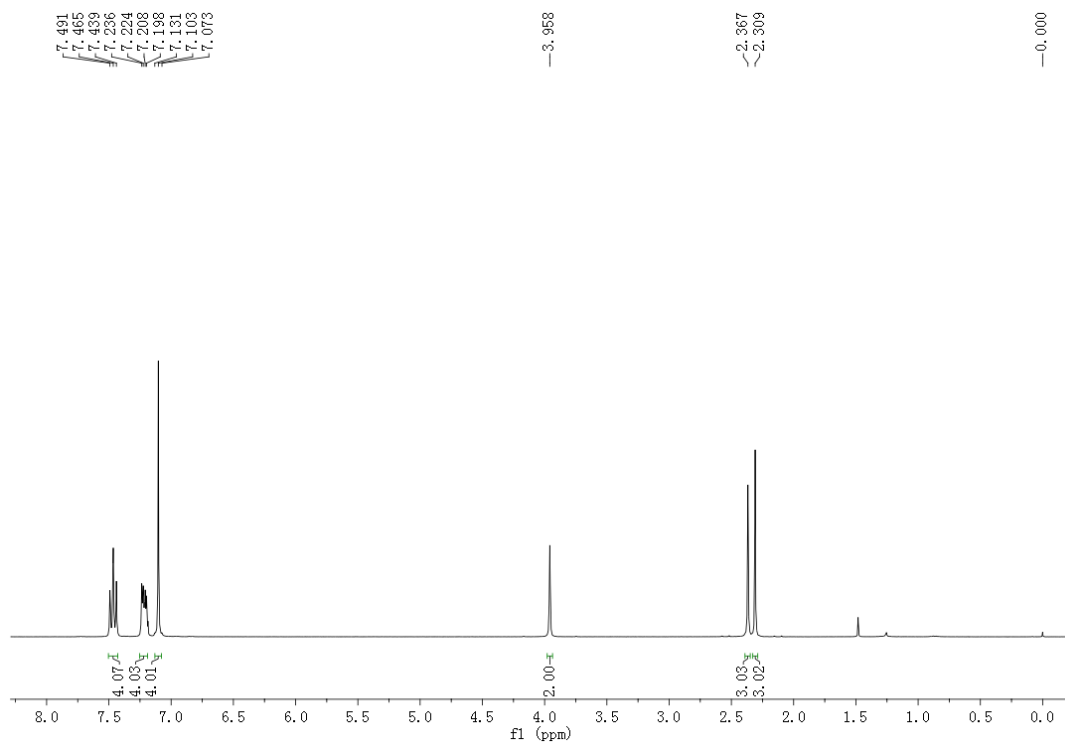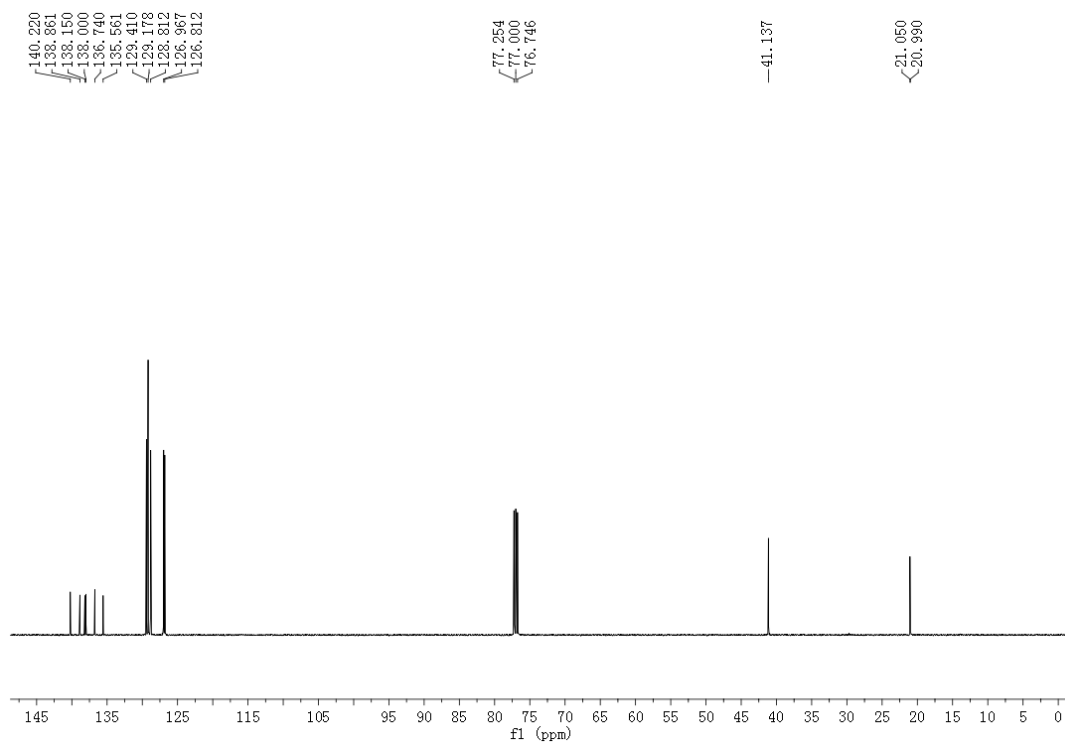

Supplement: c3ob27353a.pdf [file c3ob27353a.pdf]
